# Supplementary material for: Acute blood biomarker profiles predict cognitive deficits 6 and 12 months after COVID-19 hospitalization
Source: PubMed Central journal article supplement (PMC10579097; doi:10.1038/s41591-023-02525-y), 2023-08-31
Supplement: 41591_2023_2525_MOESM1_ESM.pdf [file 41591_2023_2525_MOESM1_ESM.pdf]

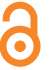

---

# Acute blood biomarker profiles predict cognitive deficits 6 and 12 months after COVID-19 hospitalization

---

In the format provided by the authors and unedited

---

# Supplementary Material

## PHOSP-COVID Collaborative Group

### Core Management Group

*Chief Investigator* C E Brightling, *Members* R A Evans (Lead Co-I), L V Wain (Lead Co-I), J D Chalmers, V C Harris, L P Ho, A Horsley, M Marks, K Poinasamy, B Raman, A Shikotra, A Singapuri

### PHOSP-COVID Study Central Coordinating Team

C E Brightling (Chief Investigator), R A Evans (*Lead Co-I*), L V Wain (*Lead Co-I*), R Dowling, C Edwardson, O Elneima, S Finney, N J Greening, B Hargadon, V C Harris, L Houchen--Wolloff, O C Leavy, H J C McAuley, C Overton, T Plekhanova, R M Saunders, M Sereno, A Singapuri, A Shikotra, C Taylor, S Terry, C Tong, B Zhao

### Steering Committee

*Co-chairs* D Lomas, E Sapey, *Institution representatives* C Berry, C E Bolton, N Brunskill, E R Chilvers, R Djukanovic, Y Ellis, D Forton, N French, J George, N A Hanley, N Hart, L McGarvey, N Maskell, H McShane, M Parkes, D Peckham, P Pfeffer, A Sayer, A Sheikh, A A R Thompson, N Williams and core management group representation

### Executive Board

*Chair* C E Brightling, representation from the core management group, each working group and platforms

## Platforms

### Bioresource

W Greenhalf (*Co-Lead*), M G Semple (*Co-Lead*), M Ashworth, H E Hardwick, L Lavelle-Langham, W Reynolds, M Sereno, R M Saunders, A Singapuri, V Shaw, A Shikotra, B Venson, L V Wain

### Data Hub

A B Docherty (*Co-Lead*), E M Harrison (*Co-Lead*), A Sheikh (*Co-Lead*), J K Baillie, C E Brightling, L Daines, R Free, R A Evans, S Kerr, O C Leavy, N I Lone, H J C McAuley, R Pius, J Quint, M Richardson, M Sereno, M Thorpe, L V Wain

### Imaging Alliance

M Halling-Brown (*Co-Lead*), F Gleeson (*Co-Lead*), J Jacob (*Co-Lead*), S Neubauer (*Co-Lead*) B Raman (*Co-Lead*) S Siddiqui (*Co-Lead*) J M Wild (*Co-Lead*), S Aslani, G Baxter, M Beggs, C Bloomfield, M P Cassar, A Chiribiri, E Cox, D J Cuthbertson, M Halling-Brown, V M Ferreira, L Finnigan, S Francis, P Jezzard, G J Kemp, H Lamlum, E Lukaschuk, C Manisty, G P McCann, C McCracken, K McGlynn, R Menke, C A Miller, A J Moss, T E Nichols, C Nikolaidou, C O'Brien, G Ogbole, B Rangelov, D P O'Regan, A Pakzad, S Piechnik, S Plein, I Propescu, A A Samat, L Saunders, Z B Sanders, R Steeds, T Treibel, E M Tunnicliffe, M Webster, J Willoughby, J Weir McCall, C Xie, M Xu

### Omics

L V Wain (*Co-Lead*), J K Baillie (*Co-Lead*), H Baxendale, C E Brightling, M Brown, J D Chalmers, R A Evans, B Gooptu, W Greenhalf, H E Hardwick, R G Jenkins, D Jones, I Koychev, C Langenberg, A Lawrie, P L Molyneaux, A Shikotra, J Pearl, M Ralser, N Sattar, R M Saunders, J T Scott, T Shaw, D Thomas, D Wilkinson

## **Working Groups**

### **Airways**

L G Heaney (*Co-Lead*), A De Soyza (*Co-Lead*), D Adeloye, C E Brightling, J S Brown, J Busby, J D Chalmers, C Echevarria, L Daines, O Elneima, RA Evans, J Hurst, P Novotny, C Nicolaou, P Pfeffer, K Poinasamy, J Quint, I Rudan, E Sapey, M Shankar-Hari, A Sheikh, S Siddiqui, S Walker, B Zheng

### **Brain**

J R Geddes (*Lead*), M Hotopf (*Co-Lead*), K Abel, R Ahmed, L Allan, C Armour, D Baguley, D Baldwin, C Ballard, K Bhui, G Breen, K Breeze, M Broome, T Brugha, E Bullmore, D Burn, F Callard, J Cavanagh, T Chalder, D Clark, A David, B Deakin, H Dobson, B Elliott, J Evans, RA Evans, R Francis, E Guthrie, P Harrison, M Henderson, A Hosseini, N Huneke, M Husain, T Jackson, I Jones, T Kabir, P Kitterick, A Korszun, I Koychev, J Kwan, A Lingford-Hughes, P Mansoori, H McAllister-Williams, K McIvor, B Michael, L Milligan, R Morriss, E Mukaetova-Ladinska, K Munro, A Nevado-Holgado, T Nicholson, C Nicolaou, S Paddick, C Pariente, J Pimm, K Saunders, M Sharpe, G Simons, J P Taylor, R Uptegrove, S Wessely

### **Cardiac**

G P McCann (*Lead*), S Amoils, C Antoniadis, A Banerjee, A Bularga, C Berry, P Chowienczyk, J P Greenwood, A D Hughes, K Khunti, C Lawson, N L Mills, A J Moss, S Neubauer, B Raman, A N Sattar, C L Sudlow, M Toshner,

### **Immunology**

P J M Openshaw (*Lead*), D Altmann, J K Baillie, R Batterham, H Baxendale, N Bishop, C E Brightling, P C Calder, R A Evans, J L Heaney, T Hussell, P Klenerman, J M Lord, P Moss, S L Rowland-Jones, W Schwaeble, M G Semple, R S Thwaites, L Turtle, L V Wain, S Walmsley, D Wraith

### **Intensive Care**

M J Rowland (*Lead*), A Rostron (*Co-Lead*), J K Baillie, B Connolly, A B Docherty, N I Lone, D F McAuley, D Parekh, A Rostron, J Simpson, C Summers

### **Lung Fibrosis**

R G Jenkins (*Co-Lead*), J Porter (*Co-Lead*), R J Allen, R Aul, J K Baillie, S Barratt, P Beirne, J Blaikley, R C Chambers, N Chaudhuri, C Coleman, E Denny, L Fabbri, P M George, M Gibbons, F Gleeson, B Gooptu, B Guillen Guio, I Hall, N A Hanley, L P Ho, E Hufton, J Jacob, I Jarrold, G Jenkins, S Johnson, M G Jones, S Jones, F Khan, P Mehta, J Mitchell, P L Molyneaux, J E Pearl, K Piper Hanley, K Poinasamy, J Quint, D Parekh, P Rivera-Ortega, L C Saunders, M G Semple, J Simpson, D Smith, M Spears, L G Spencer, S Stanel, I Stewart, A A R Thompson, D Thickett, R Thwaites, L V Wain, S Walker, S Walsh, J M Wild, D G Wootton, L Wright

### **Metabolic**

S Heller (*Co-Lead*), M J Davies (*Co-Lead*), H Atkins, S Bain, J Dennis, K Ismail, D Johnston, P Kar, K Khunti, C Langenberg, P McArdle, A McGovern, T Peto, J Petrie, E Robertson, N Sattar, K Shah, J Valabhji, B Young

### **Pulmonary and Systemic Vasculature**

L S Howard (*Co-Lead*), Mark Toshner (*Co-Lead*), C Berry, P Chowienczyk, D Lasserson, A Lawrie, O C Leavy, J Mitchell, J Newman, L Price, J Quint, A Reddy, J Rosedale, N Sattar, C Sudlow, A A R Thompson, J M Wild, M Wilkins

### **Rehabilitation, Sarcopenia and Fatigue**

S J Singh (*Co-Lead*), W D-C Man (*Co-Lead*), J M Lord (*Co-Lead*), N J Greening (*Co-Lead*), T Chalder (*Co-Lead*), J T Scott (*Co-Lead*), N Armstrong, E Baldry, M Baldwin, N Basu, M Beadsworth, L Bishop, C E Bolton, A Briggs, M Buch, G Carson, J Cavanagh, H Chinoy, C Dawson, E Daynes, S Defres, R A Evans, L Gardiner, P Greenhaff, S Greenwood, M Harvie, L Houchen-Wolloff, M Husain, S MacDonald, A McArdle, H J C McAuley, A McMahon, M McNarry, G Mills, C Nolan, K O'Donnell, D Parekh, Pimm, J Sargent, L Sigfrid, M Steiner, D Stensel, A L Tan, I Vogiatzis, J Whitney, D Wilkinson, D Wilson, M Witham, D G Wootton, T Yates

### **Renal**

D Thomas (*Lead*), N Brunskill (*Co-Lead*), S Francis (*Co-Lead*), S Greenwood (*Co-Lead*), C Laing (*Co-Lead*), K Bramham, P Chowdhury, A Frankel, L Lightstone, S McAdoo, K McCafferty, M Ostermann, N Selby, C Sharpe, M Willicombe

### **Patient Public Engagement Group**

L Houchen-Wolloff (*Lead*), J Bunker, R Gill, C Hastie, R Nathu, N Rogers, N Smith

### **Local Clinical Centre PHOSP-COVID trial staff**

(listed in alphabetical order)

#### **Airedale NHS Foundation Trust**

A Shaw (PI), L Armstrong, B Hairsine, H Henson, C Kurasz, L Shenton

#### **Aneurin Bevan University Health Board**

S Fairbairn (PI), A Dell, N Hawkings, J Haworth, M Hoare, A Lucey, V Lewis, G Mallison, H Nassa, C Pennington, A Price, C Price, A Storie, G Willis, S Young

#### **Barts Health NHS Trust & Queen Mary University of London**

P Pfeffer (PI), K Chong-James, C David, W Y James, C Manisty, A Martineau, O Zongo

#### **Barnsley Hospital NHS Foundation Trust**

A Sanderson (PI)

#### **Belfast Health and Social Care Trust & Queen's University Belfast**

L G Heaney (PI), C Armour, V Brown, T Craig, S Drain, B King, N Magee, D McAulay, E Major, L McGarvey, J McGinness, R Stone

#### **Betsi Cadwaladr University Health Board**

A Haggart (PI), A Bolger, F Davies, J Lewis, A Lloyd, R Manley, E McIvor, D Menzies, K Roberts, W Saxon, D Southern, C Subbe, V Whitehead

#### **Borders General Hospital, NHS Borders**

H El-Taweel (PI), J Dawson, L Robinson

#### **Bradford Teaching Hospitals NHS Foundation Trust**

D Saralaya (PI), L Brear, K Regan, K Storton

**Cambridge University Hospitals NHS Foundation Trust, NIHR Cambridge Clinical Research Facility & University of Cambridge**

J Fuld (PI), A Bermperri, I Cruz, K Dempsey, A Elmer, H Jones, S Jose, S Marciniak, M Parkes, C Ribeiro, J Taylor, M Toshner, L Watson, J Weir McCall, J Worsley

**Cardiff and Vale University Health Board**

R Sabit (PI), L Broad, A Buttress, T Evans, M Haynes, L Jones, L Knibbs, A McQueen, C Oliver, K Paradowski, J Williams

**Chesterfield Royal Hospital NHS Trust**

E Harris (PI), C Sampson

**Cwm Taf Morgannwg University Health Board**

C Lynch (PI), E Davies, C Evenden , A Hancock, K Hancock, M Rees , L Roche, N Stroud, T Thomas-Woods

**East Cheshire NHS Trust**

M Babores (PI), J Bradley-Potts, M Holland, N Keenan, S Shashaa, H Wassall

**East Kent Hospitals University NHS Foundation Trust**

E Beranova (PI), H Weston (PI), T Cosier, L Austin, J Deery, T Hazelton, C Price, H Ramos, R Solly, S Turney

**Gateshead NHS Trust**

L Pearce (PI), W McCormick, S Pugmire, W Stoker, A Wilson

**Guy's and St Thomas' NHS Foundation Trust**

N Hart (PI), LA Aguilar Jimenez, G Arbane, S Betts, K Bisnauthsing, A Dewar, P Chowdhury, A Chiribiri, A Dewar, G Kaltsakas, H Kerslake, MM Magtoto, P Marino, LM Martinez, C O'Brien, M Ostermann, J Rosedale, TS Solano, E Wynn

**Hampshire Hospitals NHS Foundation Trust**

N Williams (PI), W Storrar (PI), M Alvarez Corral, A Arias, E Bevan, D Griffin, J Martin, J Owen, S Payne, A Prabhu, A Reed, C Wrey Brown

**Harrogate and District NHD Foundation Trust**

C Lawson (PI), T Burdett, J Featherstone, A Layton, C Mills, L Stephenson,

**Hull University Teaching Hospitals NHS Trust & University of Hull**

N Easom (PI), P Atkin, K Brindle, M G Crooks, K Drury, R Flockton, L Holdsworth, A Richards, D L Sykes, S Thackray-Nocera, C Wright

**Hywel Dda University Health Board**

K E Lewis (PI), A Mohamed (PI), G Ross (PI), S Coetzee, K Davies, R Hughes, R Loosley, L O'Brien, Z Omar, H McGuinness, E Perkins, J Phipps, A Taylor, H Tench, R Wolf-Roberts

**Imperial College Healthcare NHS Trust & Imperial College London**

L S Howard (PI), O Kon (PI), D C Thomas (PI), S Anifowose, L Burden, E Calvelo, B Card, C Carr, E R Chilvers, D Copeland, P Cullinan, P Daly, L Evison, T Fayzan, H Gordon, S Haq, R G Jenkins, C King, K March, M Mariveles, L McLeavey, N Mohamed, S Moriera, U Munawar, J Nunag, U Nwanguma, L Orriss- Dib, D P O'Regan, A Ross, M Roy, E Russell, K Samuel, J Schronce, N Simpson, L Tarusan, C Wood, N Yasmin

**Kettering General Hospital NHS Trust**

R Reddy (PI), A-M, Guerdetto, M Hewitt, K Warwick, S White

**King's College Hospital NHS Foundation Trust & Kings College London**

A M Shah (PI), C J Jolley (PI), O Adeyemi, R Adrego, H Assefa-Kebede, J Breeze, M Brown, S Byrne, T Chalder, A Chiribiri, P Dulawan, N Hart, A Hayday, A Hoare, A Knighton, M Malim, C O'Brien, S Patale, I Peralta, N Powell, A Ramos, K Shevket, F Speranza, A Te

**Leeds Teaching Hospitals & University of Leeds**

P Beirne (PI), A Ashworth, J Clarke, C Coupland, M Dalton, E Wade, C Favager, J Greenwood, J Glossop, L Hall, T Hardy, A Humphries, J Murira, D Peckham, S Plein, J Rangeley, G Saalmink, A L Tan, B Whittam, N Window, J Woods,

**Lewisham & Greenwich NHS Trust**

G Coakley (PI)

**Liverpool University Hospitals NHS Foundation Trust & University of Liverpool**

D G Wootton (PI), L Turtle (PI), L Allerton, AM All, M Beadsworth, A Berridge, J Brown, S Cooper, A Cross, D J Cuthbertson, S Defres, S L Dobson, J Earley, N French, W Greenhalf, H E Hardwick, K Hainey, J Hawkes, V Highett, S Kaprowska, G J Kemp, AL Key, S Koprowska, L Lavelle-Langham, N Lewis-Burke, G Madzamba, F Malein, S Marsh, C Mears, L Melling, M J Noonan, L Poll, J Pratt, E Richardson, A Rowe, M G Semple, V Shaw, K A Tripp, B Vinson, L O Wajero, S A Williams-Howard, J Wyles

**London North West University Healthcare NHS Trust**

S N Diwanji (PI), P Papineni (PI), S Gurrarn, S Quaid, G F Tiongson, E Watson

**Manchester University NHS Foundation Trust & University of Manchester**

B Al-Sheklly (PI), A Horsley (PI), C Avram, J Blaikely, M Buch, N Choudhury, D Faluyi, T Felton, T Gorsuch, N A Hanley, T Hussell, Z Kausar, C A Miller, N Odell, R Osbourne, K Piper Hanley, K Radhakrishnan, S Stockdale

**Newcastle upon Tyne Hospitals NHS Foundation Trust & University of Newcastle**

A De Soyza (PI), C Echevarria (PI), A Ayoub, J Brown, G Burns, G Davies, H Fisher, C Francis, A Greenhalgh, P Hogarth, J Hughes, K Jiwa, G Jones, G MacGowan, D Price, A Sayer, J Simpson, H Tedd, S Thomas, S West, M Witham, S Wright, A Young

**NHS Dumfries and Galloway**

M J McMahon (PI), P Neill

**NHS Greater Glasgow and Clyde Health Board & University of Glasgow**

D Anderson (PI), H Bayes (PI), C Berry (PI), D Grieve (PI), I B McInnes (PI), N Basu, A Brown, A Dougherty, K Fallon, L Gilmour, K Mangion, A Morrow, K Scott, R Sykes, R Touyz

**NHS Highland**

E K Sage (PI), F Barrett, A Donaldson

**NHS Lanarkshire**

M Patel (PI), D Bell, A Brown, M Brown, R Hamil, K Leitch, L Macliver, J Quigley, A Smith, B Welsh

**NHS Lothian & University of Edinburgh**

G Choudhury (PI), J K Baillie, S Clohisey, A Deans, A B Docherty, J Furniss, E M Harrison, S Kelly, N I Lone, D E Newby, A Sheikh

**NHS Tayside & University of Dundee**

J D Chalmers (PI), D Connell, A Elliott, C Deas, J George, S Mohammed, J Rowland, A R Solstice, D Sutherland, C J Tee

**North Bristol NHS Trust & University of Bristol**

N Maskell (PI), D Arnold, S Barrett, H Adamali, A Dipper, S Dunn, A Morley, L Morrison, L Staddon, S Waterson, H Welch

**North Middlesex Hospital NHS Trust**

B Jayaraman (PI), T Light

**Nottingham University Hospitals NHS Trust & University of Nottingham**

C E Bolton (PI), P Almeida, J Bonnington, M Chrystal, E Cox, C Dupont, S Francis, P Greenhaff, A Gupta, L Howard, W Jang, S Linford, L Matthews, R Needham, A Nikolaidis, S Prosper, K Shaw, A K Thomas

**Oxford University Hospitals NHS Foundation Trust & University of Oxford**

L P Ho (PI), N M Rahman (PI), M Ainsworth, A Alamoudi, M Beggs, A Bates, A Bloss, A Burns, P Carter, M Cassar, K M Channon, J Chen, F Conneh, T Dong, R I Evans, E Fraser, X Fu, J R Geddes, F Gleeson, P Harrison, M Havinden-Williams, P Jezzard, N Kanellakis, I Koychev, P Kurupati, X Li, E Lukaschuk, K McGlynn, H McShane, C Megson, K Motohashi, S Neubauer, D Nicoll, G Ogg, E Pacpaco, M Pavlides, Y Peng, N Petousi, J Propescu, N Rahman, B Raman, M J Rowland, K Saunders, M Sharpe, N Talbot, E Tunnicliffe

**Royal Brompton and Harefield Clinical Group, Guy's and St Thomas' NHS Foundation Trust.**

W D-C Man (PI), B Patel (PI), R E Barker, D Cristiano, N Dormand, M Gummadi, S Kon, K Liyanage, C M Nolan, S Patel, O Polgar, P Shah, S J Singh, J A Walsh

**Royal Free London NHS Foundation Trust**

J Hurst (PI), H Jarvis (PI), S Mandal (PI), S Ahmad, S Brill, L Lim, D Matila, O Olaosebikan, C Singh

**Royal Papworth Hospital NHS Foundation Trust**

M Toshner (PI), H Baxendale, L Garner, C Johnson, J Mackie, A Michael, J Pack, K Paques, H Parfrey, J Parmar

**Salford Royal NHS Foundation Trust**

N Diar Bakerly (PI), P Dark, D Evans, E Hardy, A Harvey, D Holgate, S Knight, N Mairs, N Majeed, L McMorrow, J Oxton, J Pendlebury, C Summersgill, R Ugwuoke, S Whittaker

**Salisbury NHS Foundation Trust**

W Matimba-Mupaya (PI), S Strong-Sheldrake

**Sheffield Teaching NHS Foundation Trust & University of Sheffield**

S L Rowland-Jones (PI), A A R Thompson (Co PI), J Bagshaw, M Begum, K Birchall, R Butcher, H Carborn, F Chan, K Chapman, Y Cheng, L Chetham, C Clark, Z Coburn, J Cole, M Dixon, A Fairman, J Finnigan, L Finnigan, H Foot, D Foote, A Ford, R Gregory, K Harrington, L Haslam, L Hesselden, J Hockridge, A Holbourn, B Holroyd-Hind, L Holt, A Howell, E Hurditch, F Ilyas, C Jarman, A Lawrie, E Lee, J-H Lee, R Lenagh, A Lye, I Macharia, M Marshall, A Mbuyisa, J McNeill, S Megson, J Meiring, L Milner, S Misra, H Newell, T Newman, C Norman, L Nwafor, D Pattenadk, M Plowright, J Porter, P Ravencroft, C Roddis, J Rodger, P Saunders, J Sidebottom, J Smith, L Smith, N Steele, G Stephens, R Stimpson, B Thamu, N Tinker, K Turner, H Turton, P Wade, S Walker, J Watson, J M Wild, I Wilson, A Zawia

**St George's University Hospitals NHS Foundation Trust**

R Aul (PI), M Ali, A Dunleavy (PI), D Forton, N Msimanga, M Mencias, T Samakomva, S Siddique, J Teixeira, V Tavoukjian

**Sherwood Forest Hospitals NHS Foundation Trust**

J Hutchinson (PI), L Allsop, K Bennett, P Buckley, M Flynn, M Gill, C Goodwin, M Greatorex, H Gregory, C Heeley, L Holloway, M Holmes, J Kirk, W Lovegrove, TA Sewell, S Shelton, D Sissons, K Slack, S Smith, D Sowter, S Turner, V Whitworth, I Wynter

**Shropshire Community Health NHS Trust**

L Warburton (PI), S Painter, J Tomlinson

**Somerset NHS Foundation Trust**

C Vickers (PI), T Wainwright, D Redwood, J Tilley, S Palmer

**Swansea Bay University Health Board**

G A Davies (PI), L Connor, A Cook, T Rees, F Thaivalappil, C Thomas

**Tameside and Glossop Integrated Care NHS Foundation**

A Butt (PI), M Coulding, H Jones, S Kilroy, J McCormick, J McIntosh, H Savill, V Turner, J Vere

**The Great Western Hospital Foundation Trust**

E Fraile (PI), J Ugoji

**The Hillingdon Hospitals NHS Foundation Trust**

S S Kon (PI), H Lota, G Landers, M Nasser, S Portukhay

**The Rotherham NHS Foundation Trust**

A Hormis (PI), A Daniels, J Ingham, L Zeidan

**United Lincolnshire Hospitals NHS Trust**

M Chablani (PI), L Osborne

**University College London Hospital & University College London**

M Marks (PI), J S Brown (PI), N Ahwireng, B Bang, D Basire, R C Chambers, A Checkley, R Evans, M Heightman, T Hillman, J Hurst, J Jacob, S Janes, R Jastrub, M Lipman, S Logan, D Lomas, M Merida Morillas, A Pakzad, H Plant, J C Porter, K Roy, E Wall, B Williams, M Xu

**University Hospital Birmingham NHS Foundation Trust & University of Birmingham**

D Parekh (PI), N Ahmad Haider, C Atkin, R Baggott, M Bates, A Botkai, A Casey, B Cooper, J Dasgin, K Draxlbauer, N Gautam, J Hazeldine, T Hiwot, S Holden, K Isaacs, T Jackson, S Johnson, V Kamwa, D Lewis,

J M Lord, S Madathil, C McGhee, K McGee, A Neal, A Newton Cox, J Nyaboko, D Parekh, Z Peterkin, H Qureshi, B Rangelov, L Ratcliffe, E Sapey, J Short, T Soulsby, R Steeds, J Stockley, Z Suleiman, T Thompson, M Ventura, S Walder, C Welch, D Wilson, S Yasmin, K P Yip

**University Hospitals of Derby and Burton**

P Beckett (PI) C Dickens, U Nanda

**University Hospitals of Leicester NHS Trust & University of Leicester**

C E Brightling (CI), R A Evans (PI), M Aljarroof, N Armstrong, H Arnold, H Aung, M Bakali, M Bakau, M Baldwin, M Bingham, M Bourne, C Bourne, N Brunskill, P Cairns, L Carr, A Charalambou, C Christie, M J Davies, S Diver, S Edwards, C Edwardson, O Elneima, H Evans, J Finch, S Glover, N Goodman, B Gootpu, N J Greening, K Hadley, P Haldar, B Hargadon, V C Harris, L Houchen-Wolloff, W Ibrahim, L Ingram, K Khunti, A Lea, D Lee, G P McCann, H J C McAuley, P McCourt, T McNally, G



Mills, A Moss, W Monteiro, M Pareek, S Parker, A Rowland, A Prickett, I N Qureshi, R Russell, N Samani, M Sereno, M Sharma, A Shikotra, S Siddiqui, A Singapuri, S J Singh, J Skeemer, M Soares, E Stringer, T Thornton, M Tobin, E Turner, L V Wain, T J C Ward, F Woodhead, J Wormleighton, T Yates, A Yousuf

**University Hospital Southampton NHS Foundation Trust & University of Southampton**

M G Jones (PI), C Childs, R Djukanovic, S Fletcher, M Harvey, E Marouzet, B Marshall, R Samuel, T Sass, T Wallis, H Wheeler

**Whittington Health NHS**

R Dharmagunawardena (PI), E Bright, P Crisp, M Stern

**Wirral University Teaching Hospital**

A Wight (PI), L Bailey, A Reddington

**Wrightington Wigan and Leigh NHS trust**

A Ashish (PI), J Cooper, E Robinson

**Yeovil District Hospital NHS Foundation Trust**

A Broadley (PI)

**York & Scarborough NHS Foundation Trust**

K Howard (PI), L Barman, C Brookes, K Elliott, L Griffiths, Z Guy, D Ionita, H Redfearn, C Sarginson

A Turnbull

**Health and Care Research Wales**

Y Ellis

**London School of Hygiene & Tropical Medicine (LSHTM)**

M Marks, A Briggs

**NIHR Office for Clinical Research Infrastructure**

K Holmes

**Patient Public Involvement Leads**

Asthma UK and British Lung Foundation Partnership - K Poinasamy, S Walker

**Royal Surrey NHS Foundation Trust**

M Halling-Brown

**South London and Maudsley NHS Foundation Trust & Kings College London**

G Breen, M Hotopf

**Swansea University & Swansea Welsh Network**

K Lewis, N Williams

## Supplementary Notes

### Supplementary Note 1

CCA seeks to identify the relatively complex biomarker profiles that best correlate with cognitive profiles. While it is informative to think of those biomarker profiles as being driven by specific biomarkers (e.g. by raised fibrinogen relative to CRP for the first dimension), such a simplified view might fail to capture the complexity of the biomarker profile necessary to predict cognitive outcomes. In this supplementary note, we explore the simplest representation of the dimension of covariation that can still reliably reproduce the main results from the manuscript.

One possibility would be that dimensions of covariation imply associations at the univariate level (i.e. that high fibrinogen and high D-dimer themselves predict cognitive outcomes). However, we found this not to be the case. Adjusting for all covariates as in the primary analysis, fibrinogen was significantly associated with neither C-PSQ nor MoCA at 6-months ( $p > 0.05$  for both), and neither was D-dimer ( $p > 0.05$  for both). One reason might be that such univariate associations fail to encode the role of CRP in the biomarker profile.

A simplified representation of the dimensions of covariation which captures the role of CRP is to simplify the biomarker profile to be the difference between fibrinogen and CRP for the first dimension of covariation and the difference between D-dimer and CRP for the second dimension of covariation (more specifically the difference between covariate-adjusted and, for D-dimer and CRP, log-transformed biomarker values). This amounts to setting the weights of the weighted combinations representing biomarker profiles to 1 for fibrinogen (respectively D-dimer for the second dimension) and -1 for CRP, while setting all other weights to zero. These simplified biomarker profiles were found to be significantly associated with C-PSQ at 6 months ( $r = 0.09$  and  $p < 0.0001$  for both dimensions). This implies that simplified biomarker profiles in which only fibrinogen and CRP (respectively D-dimer and CRP for the second dimension) are kept and in which their relative contributions are given equal weights are enough to capture the association between biomarkers and subjective cognitive deficit. Interestingly, the simplified profile for the first dimension of covariation was not significantly associated with the MoCA at 6-months, and the full dimension of covariation was needed to

capture this association (as in the primary analysis). This might in part reflect the lower effect size of the association with MoCA.

## **Supplementary Note 2**

The blood biomarkers used in this study are routinely collected in clinical practice and tests were performed by clinical laboratories within the National Health Service (NHS). These laboratories and the equipment that they use are subject to strict standards in terms of calibration, reliability, and accuracy of results (specifically through ISO 15189:2012 standards).

In addition, as per the PHOSP protocol (which is publicly available as part of Appendix 2 of the first PHOSP-COVID study<sup>1</sup>):

- 1) Outlying values were investigated in the raw data and excluded as appropriate. This was done before the current study was initiated.
- 2) Data quality was maintained using tools within the REDCap environment and through dashboards provided by the REDCap host site. These ensure data quality at individual sites is maintained and allow early notification of problems. Regular reviews of the data quality were undertaken by dedicated PHOSP team members.

## **Supplementary Note 3**

The cognitive subset of the Patient Symptom Questionnaire (C-PSQ) is a score ranging from 0 to 7 which we encoded as a continuous variable. Specifically, the score was defined as the sum of the following items from PSQ:

- Within the last seven days, have you had any of these symptoms...?
  - Confusion (Yes: +1 point, No: 0 point)
  - Short term memory loss (Yes: +1 point, No: 0 point)

- Difficulty with concentration (Yes: +1 point, No: 0 point)
- Difficulty with communication (Yes: +1 point, No: 0 point)
- Slowing down in your thinking (Yes: +1 point, No: 0 point)
- Do you have difficulty remembering or concentrating?:
  - No: 0 points
  - Yes, some difficulty: + 1/3 point
  - Yes, a lot of difficulty: + 2/3 points
  - Yes, cannot do at all: +1 point
- Do you have difficulty communicating, for example understanding or being understood?
  - No: 0 points
  - Yes, some difficulty: + 1/3 point
  - Yes, a lot of difficulty: + 2/3 points
  - Yes, cannot do at all: +1 point

#### Supplementary Note 4

The effect of confounding in the replication study with EHR data was reduced with 1:1 matching on the following factors (provided with ICD-10/CDC codes in brackets):

- 1) **Age** at the time of index event.
- 2) **Sex** coded as female, male, or other.
- 3) **Race** encoded as 6 separate dichotomous variables: White (2106-3), Black or African American (2054-5), American Indian or Alaska Native (1002-5), Asian (2028-9), Native Hawaiian or Other Pacific Islander (2076-8), or Unknown Race (2131-1).
- 4) **Ethnicity** encoded as Hispanic or Latino (2135-2), Not Hispanic or Latino (2186-5), or Unknown Ethnicity.
- 5) **Socioeconomic deprivation** encoded as the ICD-10 code for Problems related to housing and economic circumstances (Z59).
- 6) **Obesity** encoded as Overweight and obesity (E66)

- 7) **Hypertension** encoded as 2 dichotomous variables: Hypertensive diseases (I10-I16) and the now deprecated version that was used until 2018 Hypertension diseases (I10-I15).
- 8) **Diabetes mellitus** encoded as 2 dichotomous variables: Type 1 diabetes mellitus (E10) and Type 2 diabetes mellitus (E11).
- 9) **Chronic lower respiratory diseases** encoded by each sub-category of the corresponding ICD-10 group: Bronchitis, not specified as acute or chronic (J40), Simple and mucopurulent chronic bronchitis (J41), Unspecified chronic bronchitis (J42), Emphysema (J43), Other chronic obstructive pulmonary disease (J44), Asthma (J45), Bronchiectasis (J47).
- 10) **Nicotine dependence** encoded as the corresponding ICD-10 diagnosis (F17.2).
- 11) **Substance use disorders** encoded as the ICD-10 code for mental and behavioural disorders due to psychoactive substance use (F10-F19).
- 12) **Psychotic disorders** encoded as the ICD-10 code for schizophrenia, schizotypal, delusional, and other non-mood psychotic disorders (F20-F29).
- 13) **Mood disorders** encoded as a single variable (as well as individual codes, see below) with any of the ICD10 code for mood disorders (F30-F39).
- 14) **Anxiety disorders** encoded as the ICD-10 code for anxiety, dissociative, stress-related, somatoform and other nonpsychotic mental disorders (F40-F48)
- 15) **Heart diseases** encoded as 2 categorical variables: Ischaemic heart disease (I20-I25) and Other forms of heart disease (I30-I52).
- 16) **Chronic kidney disease** encoded as 2 dichotomous variables: Chronic kidney disease (N18) and Hypertensive chronic kidney disease (I12).
- 17) **Chronic liver disease** encoded as 8 categorical variables: Alcoholic liver disease (K70), Hepatic failure, not elsewhere classified (K72), Chronic hepatitis, not elsewhere classified (K73), Fibrosis and cirrhosis of liver (K74), Fatty (change of) liver, not elsewhere classified (K76.0), Chronic passive congestion of liver (K76.1), Portal hypertension (K76.6), Other specified diseases of liver (K76.8).
- 18) **Stroke** encoded as the dichotomous variable Cerebral infarction (I63) .

- 19) **Dementia** encoded as 6 dichotomous variables: Vascular dementia (F01), Dementia in other diseases classified elsewhere (F02), Unspecified dementia (F03), Alzheimer's disease (G30), Frontotemporal dementia (G31.0), and Dementia with Lewy bodies (G31.83).
- 20) **Neoplasm (benign or malignant) and haematological cancer in particular** encoded as 2 dichotomous variables: Neoplasms (C00-D49) and Malignant neoplasms of lymphoid, hematopoietic and related tissue (C81-C96).
- 21) **Organ transplant** encoded as 2 dichotomous variables: Renal Transplantation Procedures and Liver Transplantation Procedures.
- 22) **Rheumatoid arthritis** encoded as 2 dichotomous variables: Rheumatoid arthritis with rheumatoid factor (M05) and Other rheumatoid arthritis (M06).
- 23) **Systemic lupus erythematosus** encoded as a dichotomous variable corresponding ICD-10 code (M32).
- 24) **Psoriasis** encoded as a dichotomous variable corresponding ICD-10 code (L40).
- 25) **Disorders involving an immune mechanism** encoded as a dichotomous variable “Certain disorders involving the immune mechanism” (D80-D89).
- 26) **Insomnia** encoded as 2 dichotomous variables: Insomnia (G47.0) and Insomnia not due to a substance or known physiological condition (F51.0)
- 27) **Intracranial haemorrhage** encoded as 3 dichotomous variables: Nontraumatic subarachnoid haemorrhage (I60), Nontraumatic intracerebral haemorrhage (I61) and Other and unspecified nontraumatic intracranial haemorrhage (I62).
- 28) **Parkinsonism** encoded as 2 dichotomous variables: Parkinson’s disease (G20) and Secondary parkinsonism (G21).
- 29) **Peripheral neurologic disorders** encoded as 3 dichotomous variables: Guillan-Barre syndrome (G61.0), Nerve, nerve root and plexus disorders (G50-G59) and Diseases of myoneural junction and muscle (G70-G73).
- 30) **Encephalopathy and encephalitis** encoded as 5 dichotomous variables: Encephalopathy, unspecified (G93.40), Encephalitis, myelitis and encephalomyelitis (G04), Encephalitis, myelitis and encephalomyelitis

in diseases classified elsewhere (G05), Unspecified viral encephalitis (A86) and Other specified viral encephalitis (A85.8).

31) **Cognitive impairment and mental disorders** encoded as 3 dichotomous variables: Mild cognitive impairment, so stated (G31.84), Dyslexia and other symbolic dysfunctions, not elsewhere classified (R48), Other specified mental disorders due to known physiological condition (F06.8).

32) **Altered mental state** encoded as 3 dichotomous variables: Delirium due to known physiological condition (F05), Somnolence, stupor, coma (R40), Other symptoms and signs involving cognitive functions and awareness (R41).

33) **Epilepsy and seizures** encoded as 2 dichotomous variables: Epilepsy and recurrent seizures (G40) and Convulsions, not elsewhere classified (R56).

34) **Antipsychotics** as a class, encoded as VA Class CN700

35) **Clozapine** encoded as RxNorm 2626

36) **Antidepressants** as a class, encoded as VA Class CN600

37) **Fluvoxamine** encoded as RxNorm 42355

38) **Lithium salts** encoded as VA Class CN750

39) **SARS-CoV-2** vaccination encoded as 4 dichotomous variables:

a) SARS-CoV-2 (covid-19) vaccine, unspecified encoded as CVX 213

b) Pfizer's Severe acute respiratory syndrome coronavirus 2 (SARS-CoV-2) (Coronavirus disease [COVID-19]) vaccine, mRNA-LNP, spike protein, preservative free, 30 mcg/0.3mL dosage, diluent reconstituted, for intramuscular use, encoded as CPT 91300

c) Moderna's Severe acute respiratory syndrome coronavirus 2 (SARS-CoV-2) (Coronavirus disease [COVID-19]) vaccine, mRNA-LNP, spike protein, preservative free, 100 mcg/0.5mL dosage, for intramuscular use, encoded as CPT 91301

d) Janssen's Severe acute respiratory syndrome coronavirus 2 (SARS-CoV-2) (Coronavirus disease [COVID-19]) vaccine, DNA, spike protein, adenovirus type 26 (Ad26) vector, preservative free,  $5 \times 10^{10}$  viral particles/0.5mL dosage, for intramuscular use, encoded as CPT 91303.

## Supplementary Figures

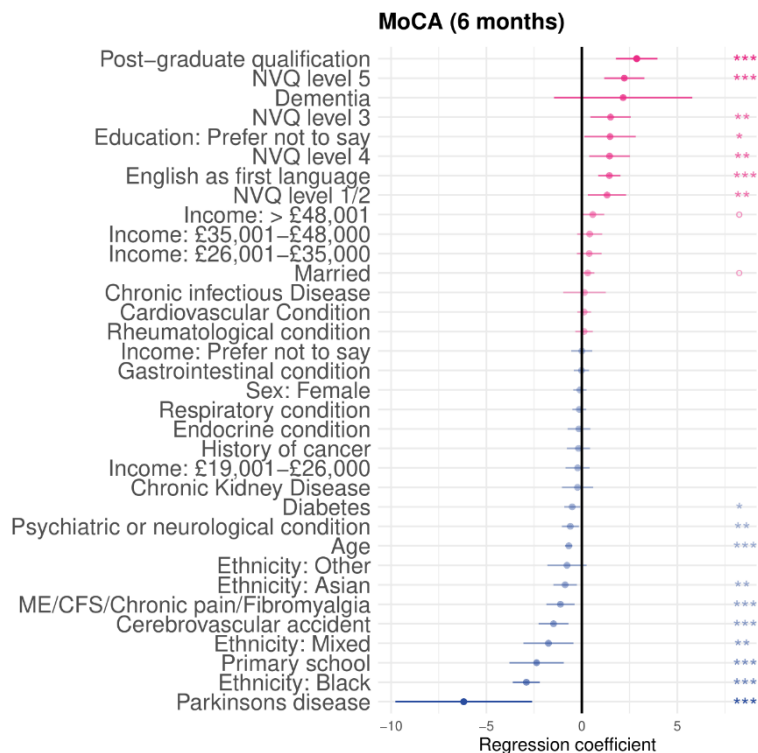

**Supplementary Figure 1:** Association between baseline characteristics and MoCA at 6 months (measuring objective cognitive deficits, lower indicate more deficits). Age was z-transformed in this analysis which means that the coefficient corresponds to a difference in MoCA corresponding to a difference by 1 standard deviation in age. ME/CFS= Myalgic Encephalomyelitis/Chronic fatigue syndrome. n=1837 individual participants. Dots indicate point estimates and horizontal lines indicate 95% confidence intervals. P-values were estimated as part of the generalised linear model and are two-sided and not adjusted for multiple comparisons: °p<0.1, \* p<0.05, \*\* p<0.01, \*\*\* p<0.001.



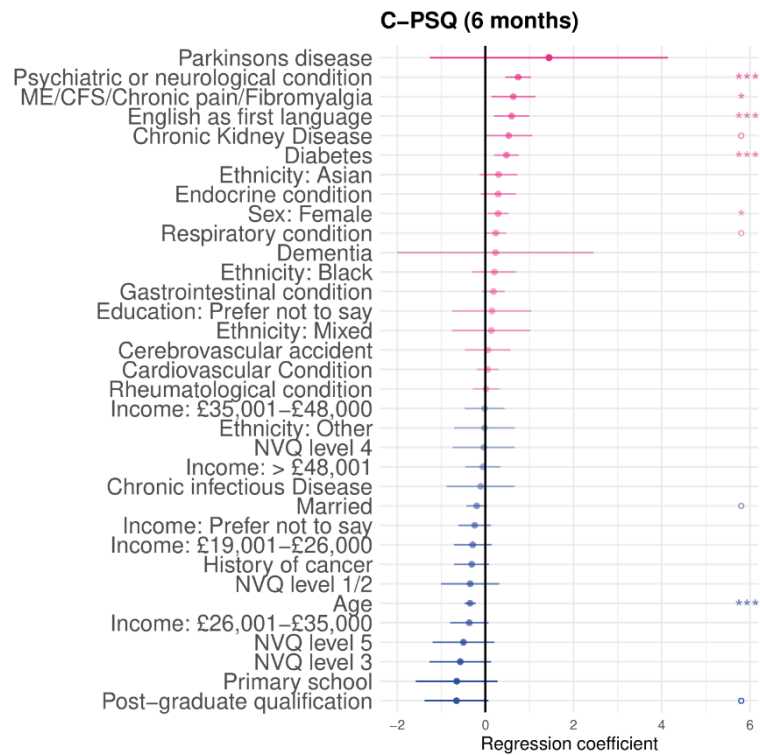

**Supplementary Figure 2:** Association between baseline characteristics and C-PSQ at 6 months (measuring subjective cognitive deficits, higher values indicate more deficits). Age was z-transformed in this analysis which means that the coefficient corresponds to a difference in C-PSQ corresponding to a difference by 1 standard deviation in age. ME/CFS= Myalgic Encephalomyelitis/Chronic fatigue syndrome. n=1502 individual participants. Dots indicate point estimates and horizontal lines indicate 95% confidence intervals. P-values were estimated as part of the generalised linear model and are two-sided and not adjusted for multiple comparisons: ° p<0.1, \* p<0.05, \*\* p<0.01, \*\*\* p<0.001.

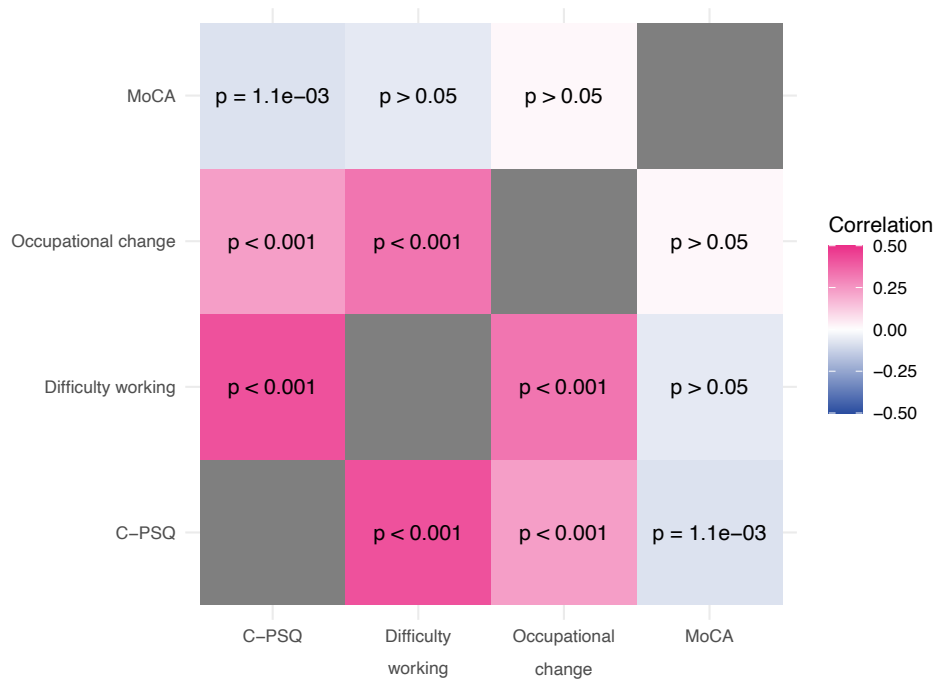

**Supplementary Figure 3:** Correlations between the different outcome variables (i.e. objective and subjective cognitive deficits and occupational outcomes) all measured at 6-months post-COVID-19.

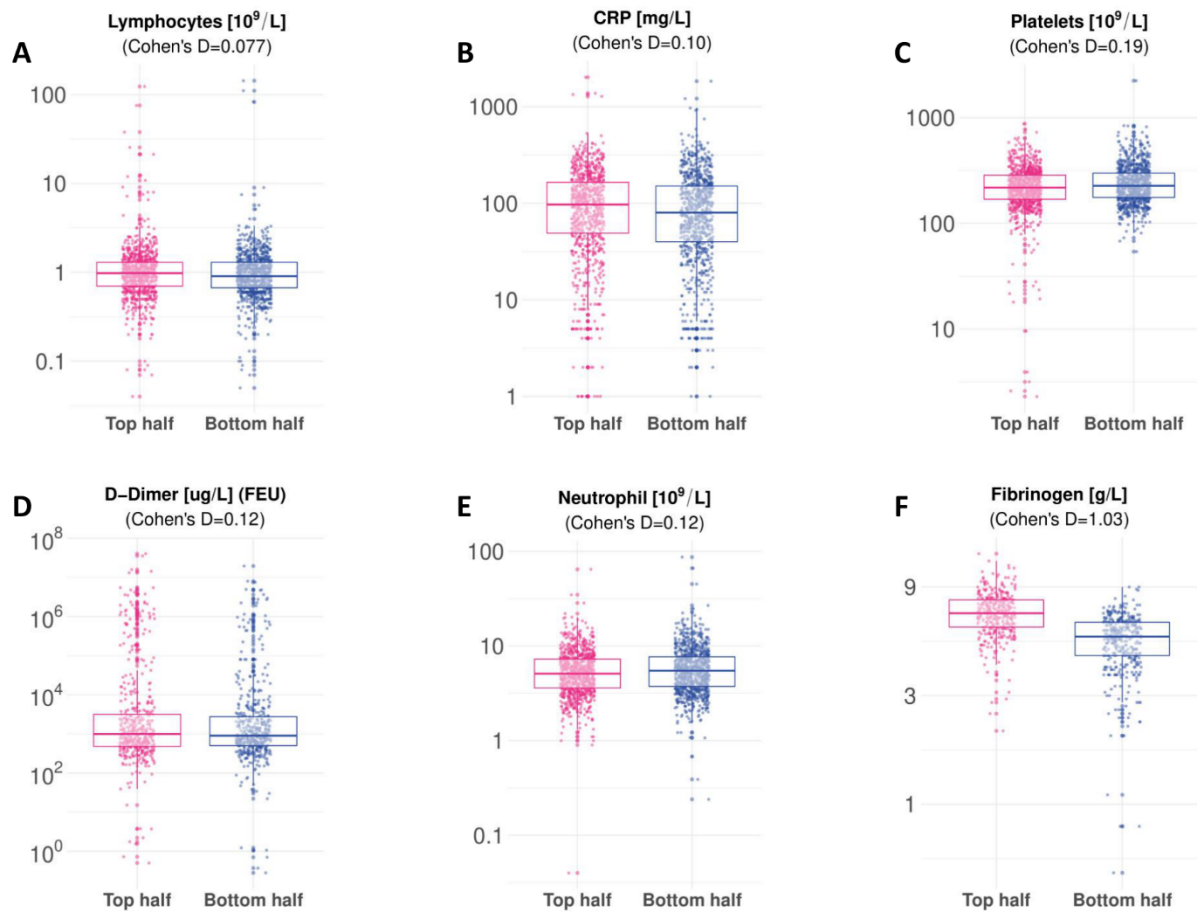

**Supplementary Figure 4:** Distribution of biomarkers between the top half and the bottom half of the cohort along the first dimension of covariation. Each of the six biomarkers are represented and only complete data are displayed ( $n=1818, 1777, 1810, 977, 1796, 768$  individual participants respectively). The centre of the boxes represent the median, their bounds represent the 25<sup>th</sup> and 75<sup>th</sup> centile and the lower and upper ends of whiskers represent the smallest/largest value, no further than 1.5 times the interquartile range from the boxplot respective end.

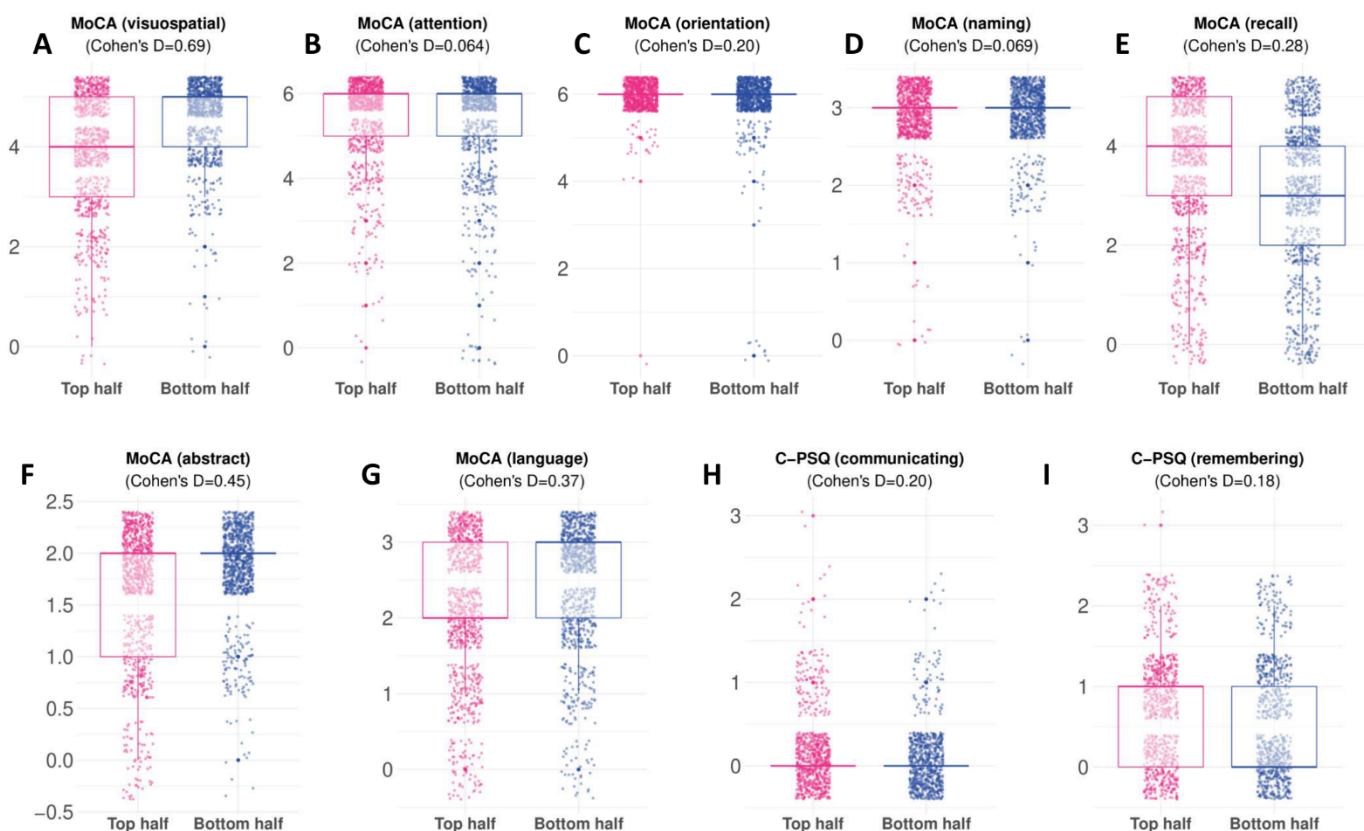

**Supplementary Figure 5:** Distribution of test scores between the top half and the bottom half of the cohort along the first dimension of covariation for different items of the MoCA and the numerical part of the C-PSQ score measured at the 6-months follow-up. Higher C-PSQ scores and lower MoCA scores represent more deficits. Only complete data are displayed ( $n=1837$  individual participants for A-G and 1537, 1544 for H and I, respectively). The centre of the boxes represent the median, their bounds represent the 25<sup>th</sup> and 75<sup>th</sup> centile and the lower and upper ends of whiskers represent the smallest/largest value, no further than 1.5 times the interquartile range from the boxplot respective end.

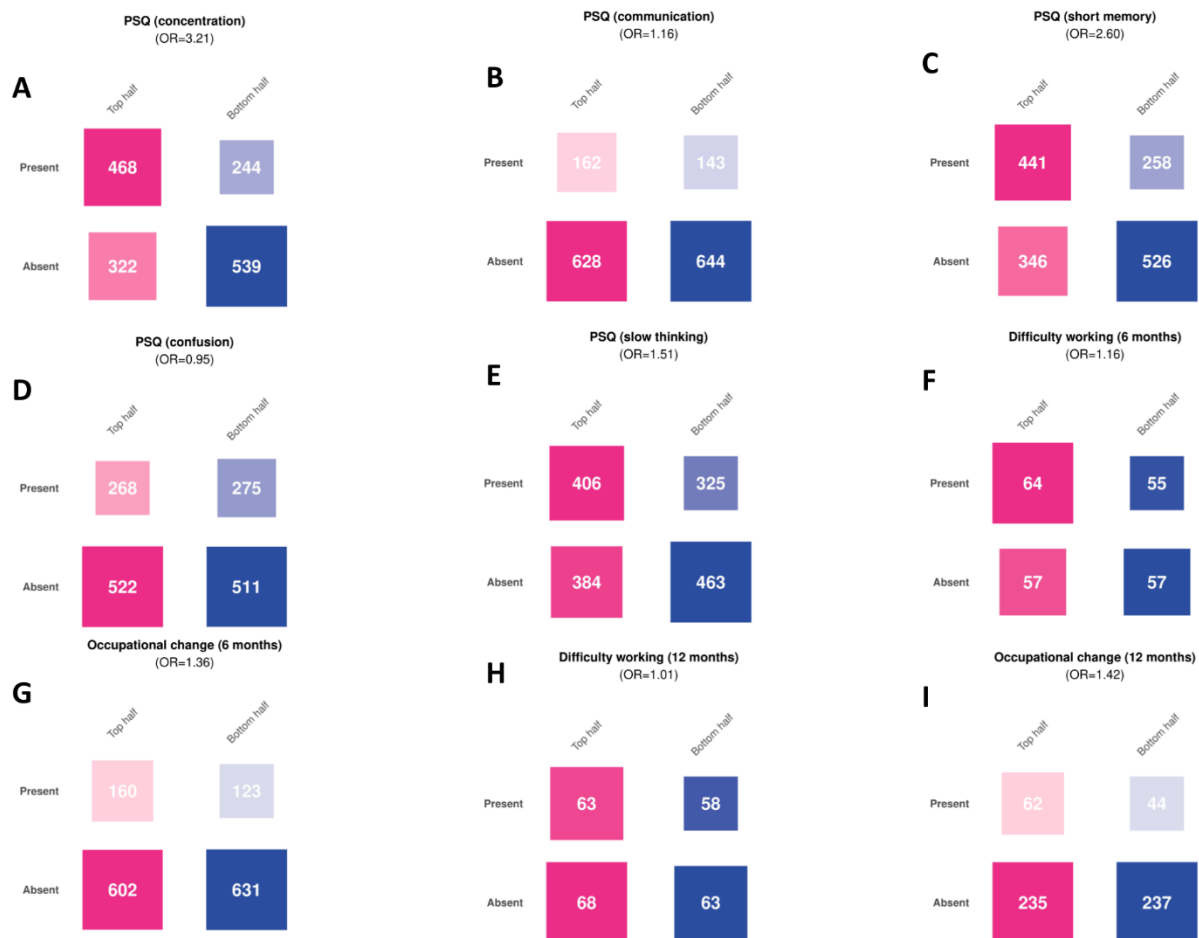

**Supplementary Figure 6:** Contingency tables showing the distributions of binary variables between the top and bottom half of the cohort along the first dimension of covariation. This is represented for signs of occupational impact (i.e. difficulty working and occupational changes) measured at 6 and 12 months follow-up and the 5 binary items of the C-PSQ score measured at the 6-months follow-up.

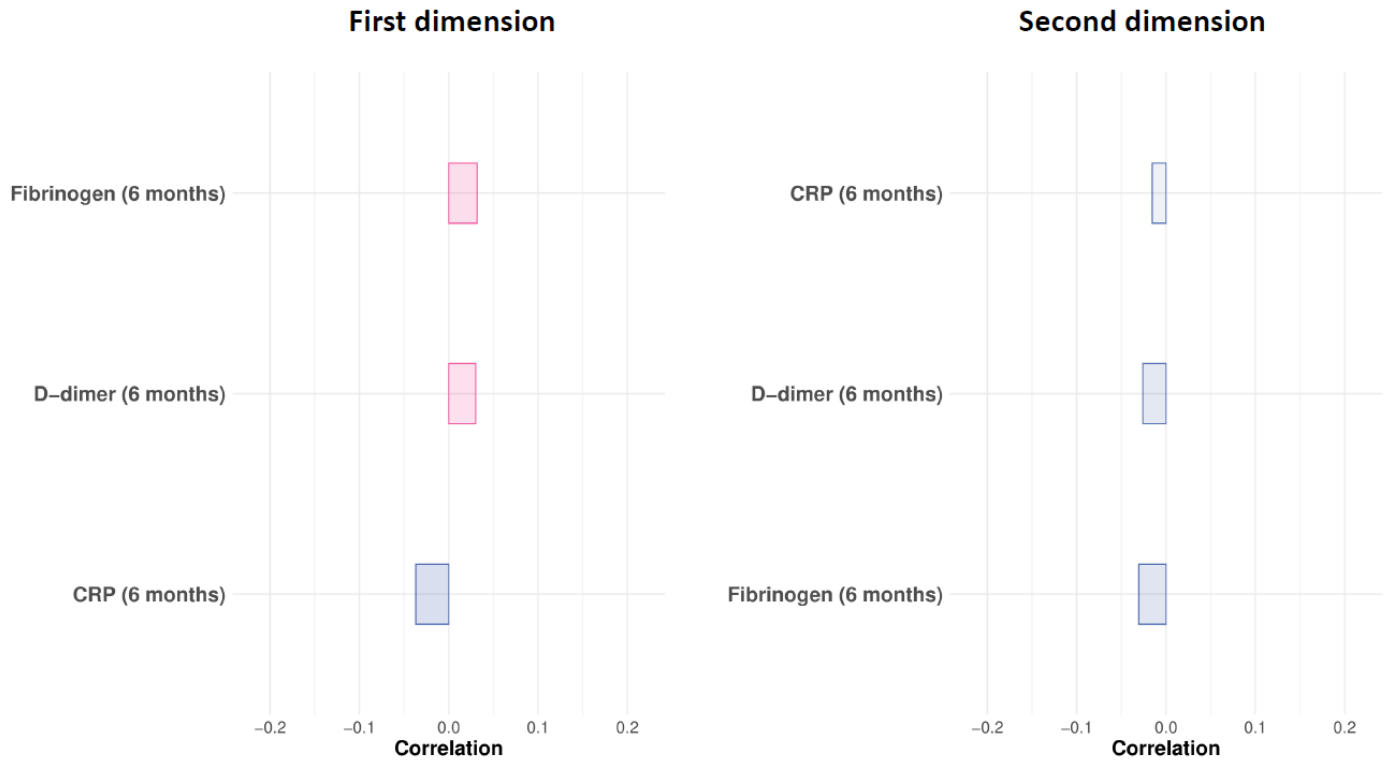

**Supplementary Figure 7:** Correlations of the key biomarkers measured at the 6-month follow-up with the cognitive profiles of the first and second dimensions of covariation. No association reached statistical significance.

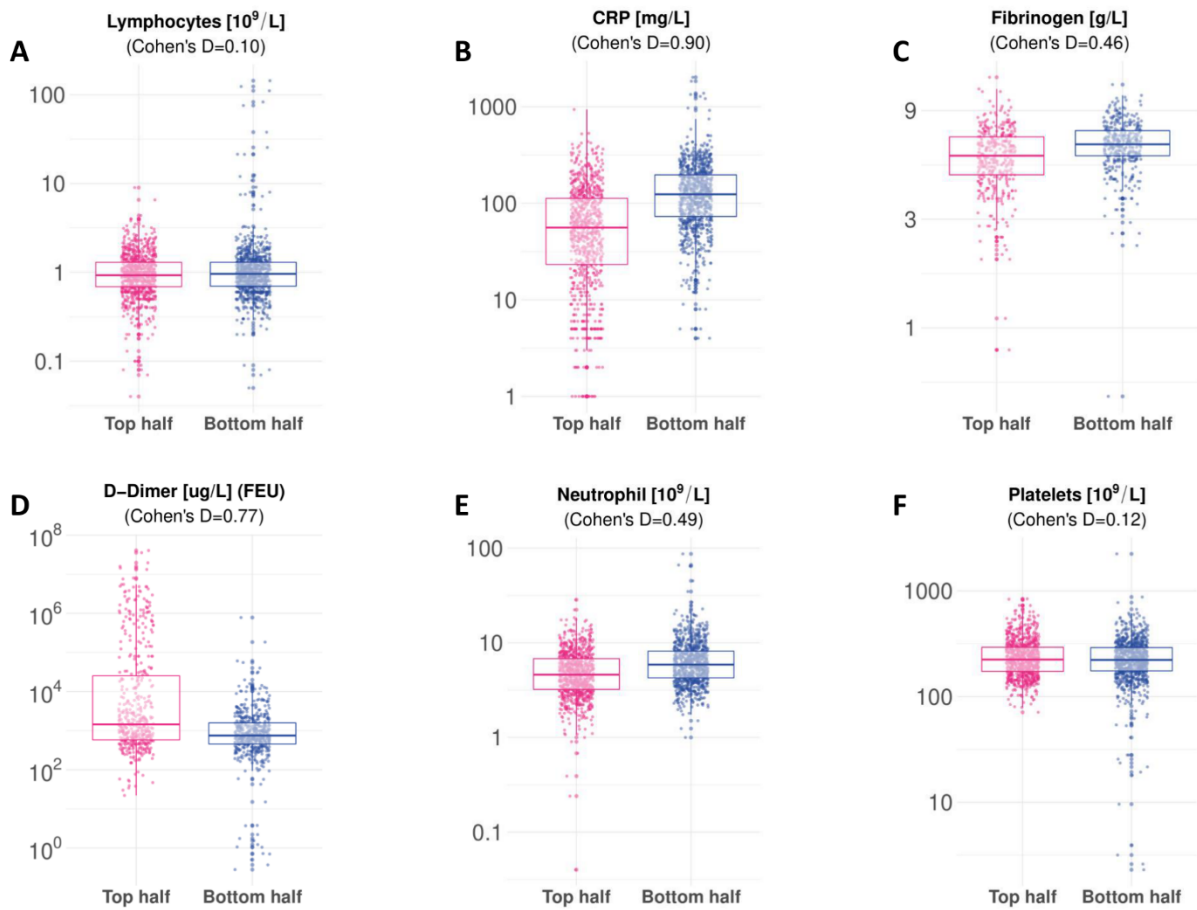

**Supplementary Figure 8:** Distribution of biomarkers between the top half and the bottom half of the cohort along the second dimension of covariation. Each of the six biomarkers are represented and only complete data are displayed ( $n=1818, 1777, 768, 977, 1796, 1810$  individual participants respectively). The centre of the boxes represent the median, their bounds represent the 25<sup>th</sup> and 75<sup>th</sup> centile and the lower and upper ends of whiskers represent the smallest/largest value, no further than 1.5 times the interquartile range from the boxplot respective end.

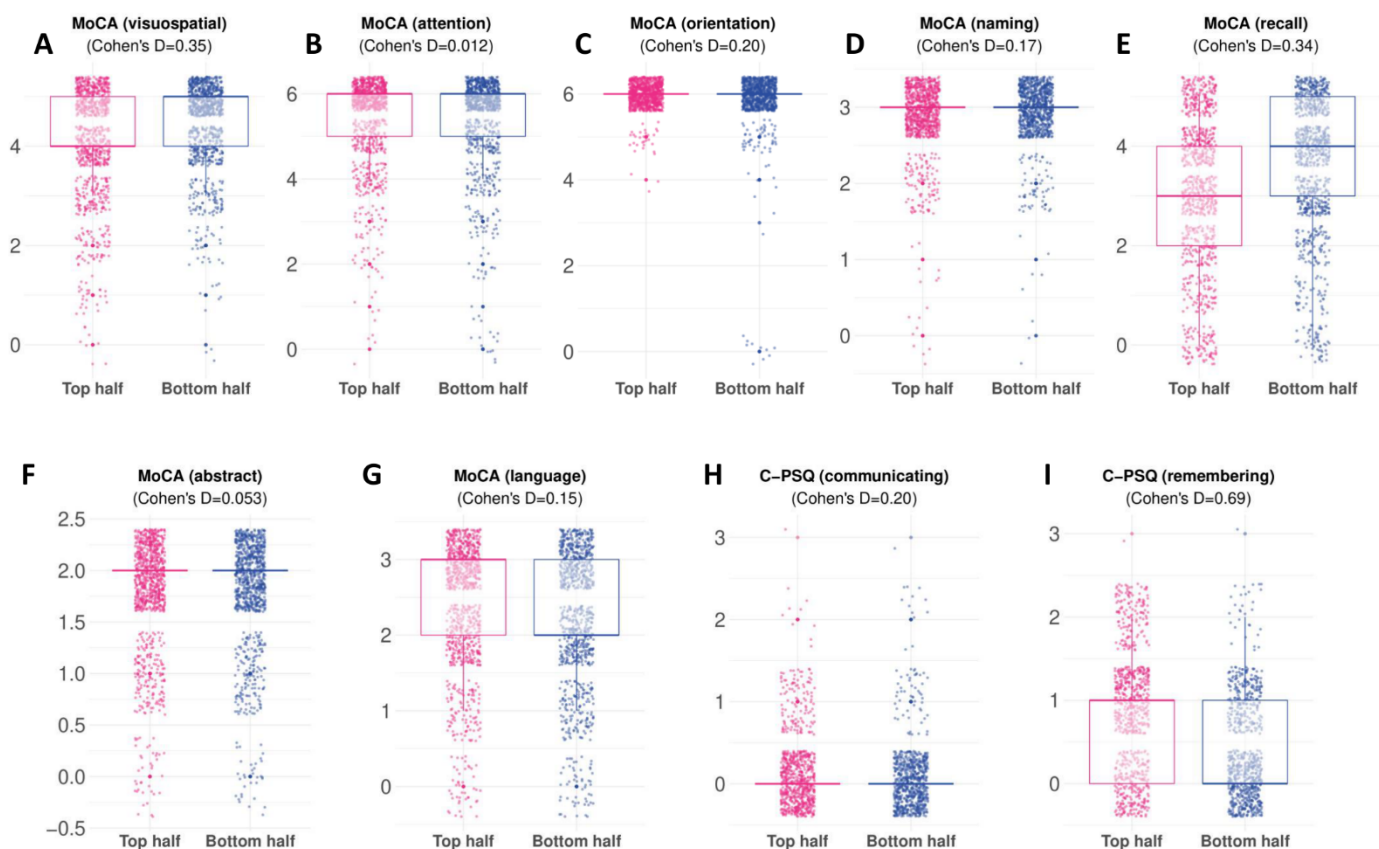

**Supplementary Figure 9:** Distribution of test scores between the top and the bottom half of the cohort along the second dimension of covariation for different items of the MoCA and the numerical part of the C-PSQ score measured at the 6-months follow-up. Higher C-PSQ scores and lower MoCA scores represent more deficits. Only complete data are displayed ( $n=1837$  individual participants for A-G and 1537, 1544 for H and I, respectively). The centre of the boxes represent the median, their bounds represent the 25<sup>th</sup> and 75<sup>th</sup> centile and the lower and upper ends of whiskers represent the smallest/largest value, no further than 1.5 times the interquartile range from the boxplot respective end.



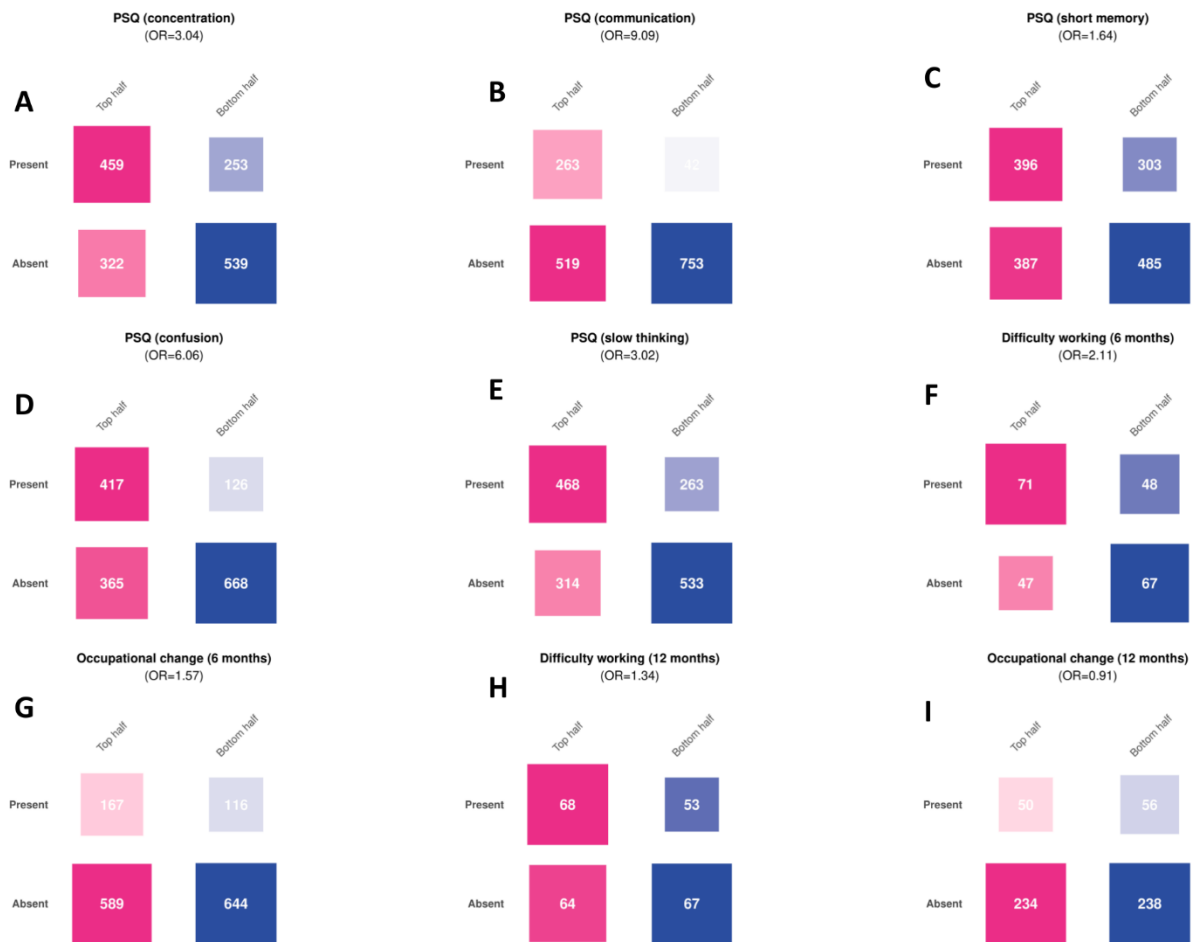

**Supplementary Figure 10:** Contingency tables showing the distributions of binary variables between the top and bottom halves of the cohort along the second dimension of covariation. This is represented for signs of occupational impact (i.e. difficulty working and occupational changes) measured at 6 and 12 months follow-up and the 5 binary items of the C-PSQ score measured at the 6-months follow-up.

## Supplementary Tables

**Supplementary Table 1:** Baseline characteristics for the entire PHOSP cohort, the study cohort, and the study cohort at the 12 months' follow-up.

| Cohort                               | PHOSP cohort | Study cohort with 6-month follow-up | 12-month follow-up study cohort |
|--------------------------------------|--------------|-------------------------------------|---------------------------------|
| Number                               | (N=6134)     | (N=1837)                            | (N=626)                         |
| <b>DEMOGRAPHICS</b>                  |              |                                     |                                 |
| Age; mean (SD)                       | 59.1 (13.5)  | 57.9 (12.4)                         | 58.7 (12.2)                     |
| Sex; n (%)                           |              |                                     |                                 |
| Female                               | 3166 (51.6)  | 1060 (57.7)                         | 385 (61.5)                      |
| Male                                 | 2130 (34.7)  | 673 (36.6)                          | 221 (35.3)                      |
| Missing                              | 838 (13.7)   | 104 (5.7)                           | 20 (3.2)                        |
| Race; n (%)                          |              |                                     |                                 |
| White                                | 4135 (67.4)  | 1385 (75.4)                         | 487 (77.8)                      |
| Mixed                                | 77 (1.3)     | 26 (1.4)                            | 10 (1.6)                        |
| Asian                                | 518 (8.4)    | 217 (11.8)                          | 79 (12.6)                       |
| Black                                | 282 (4.6)    | 104 (5.7)                           | 33 (5.3)                        |
| Other/Unknown                        | 1122 (18.3)  | 105 (5.7)                           | 17 (2.7)                        |
| Education                            |              |                                     |                                 |
| None/Primary school                  | 258 (4.2)    | 90 (4.9)                            | 25 (4.0)                        |
| Secondary school                     | 1545 (25.2)  | 550 (29.9)                          | 185 (29.6)                      |
| Sixth form college                   | 618 (10.1)   | 237 (12.9)                          | 80 (12.8)                       |
| Vocational qualification             | 624 (10.2)   | 222 (12.1)                          | 81 (12.9)                       |
| Undergraduate university degree      | 763 (12.4)   | 301 (16.4)                          | 110 (17.6)                      |
| Postgraduate qualification           | 602 (9.8)    | 237 (12.9)                          | 91 (14.5)                       |
| Prefer not to say                    | 428 (7.0)    | 51 (2.8)                            | 11 (1.8)                        |
| Missing                              | 1296 (21.1)  | 149 (8.1)                           | 43 (6.9)                        |
| Income, n (%)                        |              |                                     |                                 |
| < £19,000                            | 796 (13.0)   | 252 (13.7)                          | 77 (12.3)                       |
| £19,001 - £26,000                    | 564 (9.2)    | 207 (11.3)                          | 76 (12.1)                       |
| £26,001 - £35,000                    | 498 (8.1)    | 202 (11.0)                          | 75 (12.0)                       |
| £35,001 - £48,000                    | 519 (8.5)    | 200 (10.9)                          | 69 (11.0)                       |
| > £48,001                            | 936 (15.3)   | 439 (23.9)                          | 159 (25.4)                      |
| Prefer not to say                    | 1521 (24.8)  | 386 (21.0)                          | 129 (20.6)                      |
| Missing                              | 1300 (21.2)  | 151 (8.2)                           | 41 (6.5)                        |
| Is Married, n (%)                    |              |                                     |                                 |
| Yes                                  | 2870 (46.8)  | 1034 (56.3)                         | 371 (59.3)                      |
| No                                   | 2083 (34.0)  | 669 (36.4)                          | 217 (34.7)                      |
| Missing                              | 1181 (19.3)  | 134 (7.3)                           | 38 (6.1)                        |
| English as the first language, n (%) |              |                                     |                                 |
| Yes                                  | 4152 (67.7)  | 1469 (80.0)                         | 507 (81.0)                      |
| No                                   | 828 (13.5)   | 244 (13.3)                          | 86 (13.7)                       |
| Missing                              | 1154 (18.8)  | 124 (6.8)                           | 33 (5.3)                        |
| COMORBIDITIES, n (%)                 |              |                                     |                                 |
| Cardiovascular condition             | 2553 (41.6)  | 826 (45.0)                          | 289 (46.2)                      |
| Cerebrovascular accident             | 215 (3.5)    | 79 (4.3)                            | 27 (4.3)                        |
| Dementia                             | 17 (0.3)     | < 10                                | < 10                            |

|                                       | < 10        | < 10       | < 10       |
|---------------------------------------|-------------|------------|------------|
| Parkinson's disease                   |             |            |            |
| Neurological or psychiatric condition | 971 (15.8)  | 332 (18.1) | 100 (16.0) |
| Chronic condition                     | 242 (3.9)   | 93 (5.1)   | 29 (4.6)   |
| Diabetes                              | 1139 (18.6) | 366 (19.9) | 133 (21.2) |
| Respiratory condition                 | 1575 (25.7) | 507 (27.6) | 178 (28.4) |
| Rheumatological condition             | 854 (13.9)  | 285 (15.5) | 97 (15.5)  |
| Gastrointestinal condition            | 1044 (17.0) | 391 (21.3) | 131 (20.9) |
| Endocrine condition                   | 471 (7.7)   | 147 (8.0)  | 49 (7.8)   |
| Chronic kidney disease                | 272 (4.4)   | 72 (3.9)   | 22 (3.5)   |
| Cancer                                | 400 (6.5)   | 134 (7.3)  | 49 (7.8)   |
| Infectious disease                    | 145 (2.4)   | 38 (2.1)   | 13 (2.1)   |

**Supplementary Table 2:** Weights of the weighted combination representing the biomarker profile of the first dimension of covariation, relative weights (representing the correlation of each biomarker with the biomarker profile), and two-sided p-values (not adjusted for multiple comparisons) for each relative weight calculated using a permutation test. Note that the minimum p-value achievable with a permutation test with 10,000 permutations is 0.0001. Some associations might have smaller p-values and would be reported as  $p=0.0001$ .

|             | Weights | Relative weight | P-value |
|-------------|---------|-----------------|---------|
| D-dimer     | 0.052   | 0.079           | 0.0010  |
| Neutrophils | -0.14   | -0.11           | 0.0003  |
| Platelets   | -0.42   | -0.14           | 0.0001  |
| CRP         | -0.78   | 0.032           | 0.17    |
| Fibrinogen  | 1.36    | 0.69            | 0.0001  |
| Lymphocytes | 0.057   | 0.052           | 0.025   |

**Supplementary Table 3:** Correlations and p-values (derived from permutation tests, two-sided, and not adjusted for multiple comparisons) between cognitive outcomes (including cognitive scores and signs of occupational impact at 6 and 12 months) and the cognitive profile of the first dimension (i.e. what is displayed in Fig. 2B of the main manuscript). The correlations and p-values are also provided for the association between cognitive outcomes and the dimension of covariation (i.e. the location of individuals along the dimension of covariation which is calculated as the mean between the cognitive and biomarker profile). Two-sided p-values (not adjusted for multiple comparisons) for each correlation were calculated using a permutation test. Note that the minimum p-value achievable with a permutation test with 10,000 permutations is 0.0001. Some associations might have smaller p-values and would be reported as  $p=0.0001$

|                                 | Correlation with the cognitive profile | P value (Cognitive profile) | Correlation with the dimension of covariation | P value (Dimension of covariation) |
|---------------------------------|----------------------------------------|-----------------------------|-----------------------------------------------|------------------------------------|
| MoCA (6 months)                 | -0.075                                 | 0.0012                      | -0.057                                        | 0.014                              |
| MoCA (12 months)                | -0.16                                  | < 0.0001                    | -0.12                                         | 0.0023                             |
| Occupational change (6 months)  | 0.044                                  | 0.091                       | 0.044                                         | 0.087                              |
| Occupational change (12 months) | 0.077                                  | 0.067                       | 0.12                                          | 0.0024                             |
| Difficulty working (6 months)   | 0.086                                  | 0.19                        | 0.087                                         | 0.18                               |
| Difficulty working (12 months)  | 0.054                                  | 0.4                         | 0.049                                         | 0.44                               |
| C-PSQ (6 months)                | 0.24                                   | < 0.0001                    | 0.19                                          | 0.0001                             |
| C-PSQ (12 months)               | 0.11                                   | 0.0061                      | 0.058                                         | 0.15                               |

**Supplementary Table 4:** Weights of the weighted combination representing the biomarker profile of the second dimension of covariation, relative weights (representing the correlation of each biomarker with the biomarker profile), and two-sided p-values for each relative weight calculated using a permutation test (two-sided and non-adjusted for multiple comparisons). Note that the minimum p-value achievable with a permutation test with 10,000 permutations is 0.0001. Some associations might have smaller p-values and would be reported as p=0.0001

|             | Weight | Relative weight | P-value |
|-------------|--------|-----------------|---------|
| D-dimer     | 0.68   | 0.51            | 0.0001  |
| Neutrophils | -0.29  | -0.36           | 0.0001  |
| Platelets   | 0.3    | 0.16            | 0.0001  |
| CRP         | -0.76  | -0.62           | 0.0001  |
| Fibrinogen  | -0.007 | -0.35           | 0.0001  |
| Lymphocytes | -0.26  | -0.13           | 0.0001  |

**Supplementary Table 5:** Correlations and p-values (derived from permutation tests, two-sided, and not adjusted for multiple comparisons) between cognitive outcomes (including cognitive scores and signs of occupational impact at 6 and 12 months) and the cognitive profile of the second dimension of covariation (i.e. what is displayed in Fig. 3B of the main manuscript). The correlations and p-values are also provided for the association between cognitive outcomes and the dimension of covariation (i.e. the location of individuals along the dimension of covariation which is calculated as the mean between the cognitive and biomarker profile). Two-sided p-values (not adjusted for multiple comparisons) for each correlation were calculated using a permutation test. Note that the minimum p-value achievable with a permutation test with 10,000 permutations is 0.0001. Some associations might have smaller p-values and would be reported as p=0.0001

|                                 | Correlation with the cognitive profile | P value (Cognitive profile) | Correlation with the dimension of covariation | P value (Dimension of covariation) |
|---------------------------------|----------------------------------------|-----------------------------|-----------------------------------------------|------------------------------------|
| MoCA (6 months)                 | -0.039                                 | 0.095                       | -0.03                                         | 0.19                               |
| MoCA (12 months)                | -0.078                                 | 0.051                       | -0.053                                        | 0.18                               |
| Occupational change (6 months)  | 0.12                                   | < 0.0001                    | 0.096                                         | 0.0002                             |
| Occupational change (12 months) | 0.074                                  | 0.079                       | 0.018                                         | 0.66                               |
| Difficulty working (6 months)   | 0.24                                   | 0.0003                      | 0.24                                          | 0.0003                             |
| Difficulty working (12 months)  | 0.19                                   | 0.0018                      | 0.097                                         | 0.12                               |
| C-PSQ (6 months)                | 0.53                                   | < 0.0001                    | 0.41                                          | 0.0001                             |
| C-PSQ (12 months)               | 0.35                                   | < 0.0001                    | 0.25                                          | 0.0001                             |

**Supplementary Table 6:** Results of the mediation analysis wherein the biomarker profile was the independent variable, the cognitive profile was the dependent variable, and mediators were 14 different clinical scales capturing different aspect of participants' health. Specifically, the table presents fractions explained by each mediator for the link between biomarker and cognitive profile alongside the 1<sup>st</sup> and 2<sup>nd</sup> mode of covariation, as well as the two-sided p-value testing the null hypothesis of no mediation. P-values were two-sided, not adjusted for multiple comparisons, and derived from non-parametric bootstrap with 1000 bootstrap repetitions.

|                    | Fraction explained [%]<br>(first dimension) | P value<br>(first dimension) | Fraction explained [%]<br>(second dimension) | P value<br>(second dimension) |
|--------------------|---------------------------------------------|------------------------------|----------------------------------------------|-------------------------------|
| PHQ-9              | 1.21                                        | 0.31                         | 5.18                                         | 0.098                         |
| GAD-7              | 0.92                                        | 0.35                         | 1.49                                         | 0.65                          |
| PCL-5              | 0.4                                         | 0.68                         | 4.31                                         | 0.25                          |
| Dyspnoea-12        | 0.3                                         | 0.73                         | 8.63                                         | <0.001                        |
| GPPAQ occupational | -0.25                                       | 0.58                         | 0.082                                        | 0.9                           |
| GPPAQ exercise     | -0.25                                       | 0.61                         | 0.061                                        | 0.92                          |
| GPPAQ PAI          | -0.54                                       | 0.4                          | 0.13                                         | 0.76                          |
| SARC-F             | 0.15                                        | 0.87                         | 4.16                                         | 0.054                         |
| FACIT              | 0.23                                        | 0.82                         | 9.05                                         | 0.004                         |
| SPPB               | 0.78                                        | 0.22                         | -0.41                                        | 0.72                          |
| ISWT               | 0.089                                       | 0.81                         | 0.57                                         | 0.7                           |
| BPI severity       | 0.55                                        | 0.5                          | 1.6                                          | 0.32                          |
| BPI interference   | 0.76                                        | 0.4                          | 3.72                                         | 0.086                         |
| ISWT relative      | 0.38                                        | 0.53                         | 0.28                                         | 0.87                          |

**Supplementary Table 7:** Baseline characteristics from the EHR dataset in the cohorts hospitalised with COVID-19, and with high and low fibrinogen (and normal CRP), before and after propensity score matching.

|                                                        | Hospitalised with<br>COVID-19<br>high fibrinogen<br>(Unmatched) | Hospitalised with<br>COVID-19<br>low fibrinogen<br>(Unmatched) | Hospitalised with<br>COVID-19<br>high fibrinogen<br>(Matched) | Hospitalised with<br>COVID-19<br>low fibrinogen<br>(Matched) |
|--------------------------------------------------------|-----------------------------------------------------------------|----------------------------------------------------------------|---------------------------------------------------------------|--------------------------------------------------------------|
| Total Number                                           | 1404                                                            | 2542                                                           | 1276                                                          | 1276                                                         |
| <b>DEMOGRAPHICS</b>                                    |                                                                 |                                                                |                                                               |                                                              |
| Age; mean (SD)                                         | 48.8 (19.5)                                                     | 44.5 (24.2)                                                    | 48.1 (19.9)                                                   | 48.7 (22.3)                                                  |
| Sex; n (%)                                             |                                                                 |                                                                |                                                               |                                                              |
| Female                                                 | 480 (34.2)                                                      | 1259 (49.5)                                                    | 474 (37.1)                                                    | 488 (38.2)                                                   |
| Male                                                   | 920 (65.5)                                                      | 1283 (50.5)                                                    | 802 (62.9)                                                    | 788 (61.8)                                                   |
| Other                                                  | 10 (0.7)                                                        | 0 (0.0)                                                        | 0 (0.0)                                                       | 0 (0.0)                                                      |
| Race; n (%)                                            |                                                                 |                                                                |                                                               |                                                              |
| White                                                  | 607 (43.2)                                                      | 1234 (48.5)                                                    | 572 (44.8)                                                    | 576 (45.1)                                                   |
| Black or African American                              | 415 (29.6)                                                      | 650 (25.6)                                                     | 372 (29.2)                                                    | 375 (29.4)                                                   |
| Asian                                                  | 41 (2.9)                                                        | 80 (3.1)                                                       | 36 (2.8)                                                      | 37 (2.9)                                                     |
| American Indian or Alaska Native                       | 10 (0.7)                                                        | 18 (0.7)                                                       | 10 (0.8)                                                      | 10 (0.8)                                                     |
| Native Hawaiian or Other Pacific Islander              | 10 (0.7)                                                        | 10 (0.4)                                                       | 10 (0.8)                                                      | 10 (0.8)                                                     |
| Unknown                                                | 327 (23.3)                                                      | 557 (21.9)                                                     | 285 (22.3)                                                    | 278 (21.8)                                                   |
| Ethnicity; n (%)                                       |                                                                 |                                                                |                                                               |                                                              |
| Hispanic or Latino                                     | 361 (25.7)                                                      | 430 (16.9)                                                     | 294 (23.0)                                                    | 307 (24.1)                                                   |
| Not Hispanic or Latino                                 | 923 (65.7)                                                      | 1859 (73.1)                                                    | 871 (68.3)                                                    | 858 (67.2)                                                   |
| Unknown                                                | 120 (8.5)                                                       | 253 (10.0)                                                     | 111 (8.7)                                                     | 111 (8.7)                                                    |
| Problems related to housing and economic circumstances | 12 (0.9)                                                        | 60 (2.4)                                                       | 12 (0.9)                                                      | 10 (0.8)                                                     |
| <b>COMORBIDITIES</b>                                   |                                                                 |                                                                |                                                               |                                                              |
| Overweight and obesity                                 | 378 (26.9)                                                      | 617 (24.3)                                                     | 336 (26.3)                                                    | 345 (27.0)                                                   |
| Hypertensive disease; n (%)                            |                                                                 |                                                                |                                                               |                                                              |
| Hypertensive diseases                                  | 494 (35.2)                                                      | 921 (36.2)                                                     | 451 (35.3)                                                    | 454 (35.6)                                                   |
| Hypertensive diseases (deprecated 2018)                | 493 (35.1)                                                      | 918 (36.1)                                                     | 450 (35.3)                                                    | 453 (35.5)                                                   |
| Diabetes mellitus; n (%)                               |                                                                 |                                                                |                                                               |                                                              |
| Type 1 diabetes mellitus                               | 21 (1.5)                                                        | 37 (1.5)                                                       | 19 (1.5)                                                      | 19 (1.5)                                                     |
| Type 2 diabetes mellitus                               | 331 (23.6)                                                      | 518 (20.4)                                                     | 292 (22.9)                                                    | 298 (23.4)                                                   |
| Chronic lower respiratory diseases; n (%)              |                                                                 |                                                                |                                                               |                                                              |
| Asthma                                                 | 127 (9.0)                                                       | 264 (10.4)                                                     | 116 (9.1)                                                     | 110 (8.6)                                                    |
| Bronchiectasis                                         | 10 (0.7)                                                        | 12 (0.5)                                                       | 10 (0.8)                                                      | 10 (0.8)                                                     |
| Bronchitis, not specified as acute or chronic          | 27 (1.9)                                                        | 55 (2.2)                                                       | 24 (1.9)                                                      | 22 (1.7)                                                     |
| Emphysema                                              | 24 (1.7)                                                        | 32 (1.3)                                                       | 17 (1.3)                                                      | 20 (1.6)                                                     |
| Other chronic obstructive pulmonary disease            | 58 (4.1)                                                        | 134 (5.3)                                                      | 54 (4.2)                                                      | 54 (4.2)                                                     |
| Simple and mucopurulent chronic bronchitis             | 10 (0.7)                                                        | 10 (0.4)                                                       | 10 (0.8)                                                      | 10 (0.8)                                                     |
| Unspecified chronic bronchitis                         | 10 (0.7)                                                        | 11 (0.4)                                                       | 10 (0.8)                                                      | 10 (0.8)                                                     |
| Nicotine dependence                                    | 111 (7.9)                                                       | 248 (9.8)                                                      | 101 (7.9)                                                     | 105 (8.2)                                                    |
| Psychiatric comorbidities; n (%)                       |                                                                 |                                                                |                                                               |                                                              |
| Anxiety disorders                                      | 185 (13.2)                                                      | 440 (17.3)                                                     | 175 (13.7)                                                    | 172 (13.5)                                                   |
| Substance misuse                                       | 164 (11.7)                                                      | 373 (14.7)                                                     | 149 (11.7)                                                    | 149 (11.7)                                                   |
| Mood disorders                                         | 148 (10.5)                                                      | 333 (13.1)                                                     | 135 (10.6)                                                    | 136 (10.7)                                                   |
| Psychotic disorders                                    | 28 (2.0)                                                        | 64 (2.5)                                                       | 23 (1.8)                                                      | 21 (1.6)                                                     |
| Heart disease; n (%)                                   |                                                                 |                                                                |                                                               |                                                              |
| Ischemic heart diseases                                | 144 (10.3)                                                      | 301 (11.8)                                                     | 133 (10.4)                                                    | 150 (11.8)                                                   |
| Other forms of heart disease                           | 343 (24.4)                                                      | 712 (28.0)                                                     | 317 (24.8)                                                    | 297 (23.3)                                                   |
| Chronic kidney diseases; n (%)                         |                                                                 |                                                                |                                                               |                                                              |
| Chronic kidney disease (CKD)                           | 95 (6.8)                                                        | 206 (8.1)                                                      | 88 (6.9)                                                      | 89 (7.0)                                                     |

|                                                                   |            |            |            |            |
|-------------------------------------------------------------------|------------|------------|------------|------------|
| Hypertensive chronic kidney disease                               | 61 (4.3)   | 107 (4.2)  | 54 (4.2)   | 60 (4.7)   |
| Chronic liver diseases; n (%)                                     |            |            |            |            |
| Alcoholic liver disease                                           | 10 (0.7)   | 18 (0.7)   | 10 (0.8)   | 10 (0.8)   |
| Chronic hepatitis, not elsewhere classified                       | 10 (0.7)   | 10 (0.4)   | 10 (0.8)   | 10 (0.8)   |
| Chronic passive congestion of liver                               | 10 (0.7)   | 10 (0.4)   | 10 (0.8)   | 10 (0.8)   |
| Fatty (change of) liver, not elsewhere classified                 | 40 (2.8)   | 84 (3.3)   | 37 (2.9)   | 32 (2.5)   |
| Fibrosis and cirrhosis of liver                                   | 10 (0.7)   | 50 (2.0)   | 10 (0.8)   | 10 (0.8)   |
| Hepatic failure, not elsewhere classified                         | 22 (1.6)   | 55 (2.2)   | 18 (1.4)   | 21 (1.6)   |
| Other specified diseases of liver                                 | 17 (1.2)   | 40 (1.6)   | 17 (1.3)   | 16 (1.3)   |
| Portal hypertension                                               | 10 (0.7)   | 26 (1.0)   | 10 (0.8)   | 10 (0.8)   |
| Cerebral infarction                                               | 44 (3.1)   | 156 (6.1)  | 44 (3.4)   | 51 (4.0)   |
| Dementia; n (%)                                                   |            |            |            |            |
| Alzheimer's disease                                               | 10 (0.7)   | 20 (0.8)   | 10 (0.8)   | 10 (0.8)   |
| Dementia in other diseases classified elsewhere                   | 10 (0.7)   | 23 (0.9)   | 10 (0.8)   | 10 (0.8)   |
| Dementia with Lewy bodies                                         | 0 (0.0)    | 10 (0.4)   | 0 (0.0)    | 0 (0.0)    |
| Frontotemporal dementia                                           | 10 (0.7)   | 0 (0.0)    | 0 (0.0)    | 0 (0.0)    |
| Unspecified dementia                                              | 15 (1.1)   | 59 (2.3)   | 15 (1.2)   | 18 (1.4)   |
| Vascular dementia                                                 | 10 (0.7)   | 10 (0.4)   | 10 (0.8)   | 10 (0.8)   |
| Neoplasms; n (%)                                                  |            |            |            |            |
| Malignant neoplasms of lymphoid, hematopoietic and related tissue | 16 (1.1)   | 75 (3.0)   | 16 (1.3)   | 19 (1.5)   |
| Neoplasms (any including benign)                                  | 151 (10.8) | 380 (14.9) | 145 (11.4) | 137 (10.7) |
| Organ transplant; n (%)                                           |            |            |            |            |
| Liver Transplantation Procedures                                  | 0 (0.0)    | 10 (0.4)   | 0 (0.0)    | 0 (0.0)    |
| Renal Transplantation Procedures                                  | 10 (0.7)   | 10 (0.4)   | 10 (0.8)   | 10 (0.8)   |
| Psoriasis                                                         | 12 (0.9)   | 20 (0.8)   | 10 (0.8)   | 10 (0.8)   |
| Rheumatoid arthritis; n (%)                                       |            |            |            |            |
| Other rheumatoid arthritis                                        | 21 (1.5)   | 29 (1.1)   | 17 (1.3)   | 18 (1.4)   |
| Rheumatoid arthritis with rheumatoid factor                       | 10 (0.7)   | 10 (0.4)   | 10 (0.8)   | 10 (0.8)   |
| Systemic lupus erythematosus (SLE)                                | 10 (0.7)   | 13 (0.5)   | 10 (0.8)   | 10 (0.8)   |
| Disorders involving the immune mechanism                          | 40 (2.8)   | 115 (4.5)  | 35 (2.7)   | 35 (2.7)   |
| MEDICATIONS                                                       |            |            |            |            |
| COVID-19 vaccine; n (%)                                           |            |            |            |            |
| Pfizer                                                            | 10 (0.7)   | 10 (0.4)   | 10 (0.8)   | 10 (0.8)   |
| Moderna                                                           | 0 (0.0)    | 10 (0.4)   | 0 (0.0)    | 0 (0.0)    |
| Janssen                                                           | 0 (0.0)    | 0 (0.0)    | 0 (0.0)    | 0 (0.0)    |
| Not specified                                                     | 10 (0.7)   | 37 (1.5)   | 10 (0.8)   | 10 (0.8)   |
| Antidepressants; n (%)                                            |            |            |            |            |
| Any                                                               | 168 (12.0) | 393 (15.5) | 158 (12.4) | 158 (12.4) |
| Fluvoxamine                                                       | 10 (0.7)   | 0 (0.0)    | 0 (0.0)    | 0 (0.0)    |
| Lithium                                                           | 10 (0.7)   | 10 (0.4)   | 10 (0.8)   | 10 (0.8)   |
| Antipsychotics; n (%)                                             |            |            |            |            |
| Any                                                               | 63 (4.5)   | 151 (5.9)  | 57 (4.5)   | 58 (4.5)   |
| Clozapine                                                         | 0 (0.0)    | 10 (0.4)   | 0 (0.0)    | 0 (0.0)    |



**Supplementary Table 8:** Baseline characteristics from the EHR dataset in the cohorts hospitalised with COVID-19, and with high and low D-dimer, before and after propensity score matching.

|                                                        | Hospitalised with<br>COVID-19<br>High D-dimer<br>(Unmatched) | Hospitalised with<br>COVID-19<br>Low D-dimer<br>(Unmatched) | Hospitalised with<br>COVID-19<br>High D-dimer<br>(Matched) | Hospitalised with<br>COVID-19<br>Low D-dimer<br>(Matched) |
|--------------------------------------------------------|--------------------------------------------------------------|-------------------------------------------------------------|------------------------------------------------------------|-----------------------------------------------------------|
| Total Number                                           | 8207                                                         | 6330                                                        | 5722                                                       | 5722                                                      |
| <b>DEMOGRAPHICS</b>                                    |                                                              |                                                             |                                                            |                                                           |
| Age; mean (SD)                                         | 54.7 (19.6)                                                  | 52.5 (17.4)                                                 | 52.7 (19.6)                                                | 53.0 (17.4)                                               |
| Sex; n (%)                                             |                                                              |                                                             |                                                            |                                                           |
| Female                                                 | 3583 (43.7)                                                  | 3054 (48.2)                                                 | 2610 (45.6)                                                | 2645 (46.2)                                               |
| Male                                                   | 4614 (56.2)                                                  | 3276 (51.8)                                                 | 3112 (54.4)                                                | 3077 (53.8)                                               |
| Other                                                  | 10 (0.1)                                                     | 0 (0.0)                                                     | 0 (0.0)                                                    | 0 (0.0)                                                   |
| Race; n (%)                                            |                                                              |                                                             |                                                            |                                                           |
| White                                                  | 4446 (54.2)                                                  | 4252 (67.2)                                                 | 3704 (64.7)                                                | 3709 (64.8)                                               |
| Black or African American                              | 1948 (23.7)                                                  | 1107 (17.5)                                                 | 1024 (17.9)                                                | 1071 (18.7)                                               |
| Asian                                                  | 398 (4.8)                                                    | 190 (3.0)                                                   | 215 (3.8)                                                  | 188 (3.3)                                                 |
| American Indian or Alaska Native                       | 49 (0.6)                                                     | 50 (0.8)                                                    | 43 (0.8)                                                   | 38 (0.7)                                                  |
| Native Hawaiian or Other Pacific Islander              | 22 (0.3)                                                     | 19 (0.3)                                                    | 19 (0.3)                                                   | 18 (0.3)                                                  |
| Unknown                                                | 1344 (16.4)                                                  | 712 (11.2)                                                  | 717 (12.5)                                                 | 698 (12.2)                                                |
| Ethnicity; n (%)                                       |                                                              |                                                             |                                                            |                                                           |
| Hispanic or Latino                                     | 1805 (22.0)                                                  | 1348 (21.3)                                                 | 1264 (22.1)                                                | 1251 (21.9)                                               |
| Not Hispanic or Latino                                 | 6084 (74.1)                                                  | 4739 (74.9)                                                 | 4231 (73.9)                                                | 4255 (74.4)                                               |
| Unknown                                                | 318 (3.9)                                                    | 243 (3.8)                                                   | 227 (4.0)                                                  | 216 (3.8)                                                 |
| Problems related to housing and economic circumstances | 75 (0.9)                                                     | 94 (1.5)                                                    | 66 (1.2)                                                   | 60 (1.0)                                                  |
| <b>COMORBIDITIES</b>                                   |                                                              |                                                             |                                                            |                                                           |
| Overweight and obesity                                 | 1766 (21.5)                                                  | 1770 (28.0)                                                 | 1438 (25.1)                                                | 1426 (24.9)                                               |
| Hypertensive disease; n (%)                            |                                                              |                                                             |                                                            |                                                           |
| Hypertensive diseases                                  | 3120 (38.0)                                                  | 2431 (38.4)                                                 | 2145 (37.5)                                                | 2127 (37.2)                                               |
| Hypertensive diseases (deprecated 2018)                | 3105 (37.8)                                                  | 2422 (38.3)                                                 | 2136 (37.3)                                                | 2120 (37.0)                                               |
| Diabetes mellitus; n (%)                               |                                                              |                                                             |                                                            |                                                           |
| Type 1 diabetes mellitus                               | 111 (1.4)                                                    | 94 (1.5)                                                    | 74 (1.3)                                                   | 83 (1.5)                                                  |
| Type 2 diabetes mellitus                               | 1900 (23.2)                                                  | 1408 (22.2)                                                 | 1245 (21.8)                                                | 1246 (21.8)                                               |
| Chronic lower respiratory diseases; n (%)              |                                                              |                                                             |                                                            |                                                           |
| Asthma                                                 | 586 (7.1)                                                    | 656 (10.4)                                                  | 498 (8.7)                                                  | 514 (9.0)                                                 |
| Bronchiectasis                                         | 40 (0.5)                                                     | 18 (0.3)                                                    | 17 (0.3)                                                   | 18 (0.3)                                                  |
| Bronchitis, not specified as acute or chronic          | 157 (1.9)                                                    | 218 (3.4)                                                   | 144 (2.5)                                                  | 151 (2.6)                                                 |
| Emphysema                                              | 148 (1.8)                                                    | 108 (1.7)                                                   | 89 (1.6)                                                   | 97 (1.7)                                                  |
| Other chronic obstructive pulmonary disease            | 448 (5.5)                                                    | 396 (6.3)                                                   | 326 (5.7)                                                  | 337 (5.9)                                                 |
| Simple and mucopurulent chronic bronchitis             | 25 (0.3)                                                     | 26 (0.4)                                                    | 19 (0.3)                                                   | 18 (0.3)                                                  |
| Unspecified chronic bronchitis                         | 29 (0.4)                                                     | 33 (0.5)                                                    | 21 (0.4)                                                   | 24 (0.4)                                                  |
| Nicotine dependence                                    | 549 (6.7)                                                    | 518 (8.2)                                                   | 418 (7.3)                                                  | 418 (7.3)                                                 |
| Psychiatric comorbidities; n (%)                       |                                                              |                                                             |                                                            |                                                           |
| Anxiety disorders                                      | 1020 (12.4)                                                  | 1091 (17.2)                                                 | 818 (14.3)                                                 | 832 (14.5)                                                |
| Substance misuse                                       | 825 (10.1)                                                   | 721 (11.4)                                                  | 592 (10.3)                                                 | 589 (10.3)                                                |
| Mood disorders                                         | 816 (9.9)                                                    | 879 (13.9)                                                  | 653 (11.4)                                                 | 663 (11.6)                                                |
| Psychotic disorders                                    | 145 (1.8)                                                    | 119 (1.9)                                                   | 100 (1.7)                                                  | 99 (1.7)                                                  |
| Heart disease; n (%)                                   |                                                              |                                                             |                                                            |                                                           |
| Ischemic heart diseases                                | 945 (11.5)                                                   | 676 (10.7)                                                  | 607 (10.6)                                                 | 593 (10.4)                                                |
| Other forms of heart disease                           | 2101 (25.6)                                                  | 1619 (25.6)                                                 | 1422 (24.9)                                                | 1421 (24.8)                                               |
| Chronic kidney diseases; n (%)                         |                                                              |                                                             |                                                            |                                                           |
| Chronic kidney disease (CKD)                           | 702 (8.6)                                                    | 531 (8.4)                                                   | 446 (7.8)                                                  | 437 (7.6)                                                 |

|                                                                   |             |             |            |            |
|-------------------------------------------------------------------|-------------|-------------|------------|------------|
| Hypertensive chronic kidney disease                               | 311 (3.8)   | 155 (2.4)   | 157 (2.7)  | 148 (2.6)  |
| Chronic liver diseases; n (%)                                     |             |             |            |            |
| Alcoholic liver disease                                           | 53 (0.6)    | 10 (0.2)    | 10 (0.2)   | 10 (0.2)   |
| Chronic hepatitis, not elsewhere classified                       | 10 (0.1)    | 10 (0.2)    | 10 (0.2)   | 10 (0.2)   |
| Chronic passive congestion of liver                               | 29 (0.4)    | 16 (0.3)    | 14 (0.2)   | 15 (0.3)   |
| Fatty (change of) liver, not elsewhere classified                 | 248 (3.0)   | 289 (4.6)   | 204 (3.6)  | 215 (3.8)  |
| Fibrosis and cirrhosis of liver                                   | 84 (1.0)    | 61 (1.0)    | 51 (0.9)   | 46 (0.8)   |
| Hepatic failure, not elsewhere classified                         | 69 (0.8)    | 13 (0.2)    | 10 (0.2)   | 13 (0.2)   |
| Other specified diseases of liver                                 | 128 (1.6)   | 121 (1.9)   | 96 (1.7)   | 84 (1.5)   |
| Portal hypertension                                               | 34 (0.4)    | 10 (0.2)    | 10 (0.2)   | 10 (0.2)   |
| Cerebral infarction                                               | 233 (2.8)   | 173 (2.7)   | 151 (2.6)  | 140 (2.4)  |
| Dementia; n (%)                                                   |             |             |            |            |
| Alzheimer's disease                                               | 67 (0.8)    | 36 (0.6)    | 28 (0.5)   | 34 (0.6)   |
| Dementia in other diseases classified elsewhere                   | 84 (1.0)    | 46 (0.7)    | 42 (0.7)   | 42 (0.7)   |
| Dementia with Lewy bodies                                         | 10 (0.1)    | 10 (0.2)    | 10 (0.2)   | 10 (0.2)   |
| Frontotemporal dementia                                           | 10 (0.1)    | 0 (0.0)     | 0 (0.0)    | 0 (0.0)    |
| Unspecified dementia                                              | 191 (2.3)   | 101 (1.6)   | 93 (1.6)   | 94 (1.6)   |
| Vascular dementia                                                 | 22 (0.3)    | 22 (0.3)    | 18 (0.3)   | 14 (0.2)   |
| Neoplasms; n (%)                                                  |             |             |            |            |
| Malignant neoplasms of lymphoid, hematopoietic and related tissue | 75 (0.9)    | 48 (0.8)    | 48 (0.8)   | 43 (0.8)   |
| Neoplasms (any including benign)                                  | 988 (12.0)  | 904 (14.3)  | 724 (12.7) | 724 (12.7) |
| Organ transplant; n (%)                                           |             |             |            |            |
| Liver Transplantation Procedures                                  | 10 (0.1)    | 0 (0.0)     | 0 (0.0)    | 0 (0.0)    |
| Renal Transplantation Procedures                                  | 10 (0.1)    | 0 (0.0)     | 0 (0.0)    | 0 (0.0)    |
| Psoriasis                                                         | 58 (0.7)    | 46 (0.7)    | 42 (0.7)   | 41 (0.7)   |
| Rheumatoid arthritis; n (%)                                       |             |             |            |            |
| Other rheumatoid arthritis                                        | 104 (1.3)   | 86 (1.4)    | 63 (1.1)   | 71 (1.2)   |
| Rheumatoid arthritis with rheumatoid factor                       | 21 (0.3)    | 20 (0.3)    | 13 (0.2)   | 17 (0.3)   |
| Systemic lupus erythematosus (SLE)                                | 42 (0.5)    | 31 (0.5)    | 24 (0.4)   | 27 (0.5)   |
| Disorders involving the immune mechanism                          | 198 (2.4)   | 250 (3.9)   | 164 (2.9)  | 183 (3.2)  |
| MEDICATIONS                                                       |             |             |            |            |
| COVID-19 vaccine; n (%)                                           |             |             |            |            |
| Pfizer                                                            | 50 (0.6)    | 53 (0.8)    | 37 (0.6)   | 39 (0.7)   |
| Moderna                                                           | 10 (0.1)    | 10 (0.2)    | 10 (0.2)   | 10 (0.2)   |
| Janssen                                                           | 10 (0.1)    | 10 (0.2)    | 10 (0.2)   | 10 (0.2)   |
| Not specified                                                     | 135 (1.6)   | 59 (0.9)    | 49 (0.9)   | 53 (0.9)   |
| Antidepressants; n (%)                                            |             |             |            |            |
| Any                                                               | 1151 (14.0) | 1187 (18.8) | 935 (16.3) | 938 (16.4) |
| Fluvoxamine                                                       | 13 (0.2)    | 10 (0.2)    | 10 (0.2)   | 10 (0.2)   |
| Lithium                                                           | 14 (0.2)    | 10 (0.2)    | 10 (0.2)   | 10 (0.2)   |
| Antipsychotics; n (%)                                             |             |             |            |            |
| Any                                                               | 425 (5.2)   | 348 (5.5)   | 284 (5.0)  | 301 (5.3)  |
| Clozapine                                                         | 10 (0.1)    | 10 (0.2)    | 10 (0.2)   | 10 (0.2)   |

**Supplementary Table 9:** Baseline characteristics from the EHR dataset in the cohorts hospitalised before the COVID-19 pandemic (i.e. without COVID-19), and with high and low fibrinogen, before and after propensity score matching.

|                                                        | <b>Other hospitalisation high fibrinogen (Unmatched)</b> | <b>Other hospitalisation low fibrinogen (Unmatched)</b> | <b>Other hospitalisation high fibrinogen (Matched)</b> | <b>Other hospitalisation low fibrinogen (Matched)</b> |
|--------------------------------------------------------|----------------------------------------------------------|---------------------------------------------------------|--------------------------------------------------------|-------------------------------------------------------|
| Total Number                                           | 6786                                                     | 34139                                                   | 6782                                                   | 6782                                                  |
| <b>DEMOGRAPHICS</b>                                    |                                                          |                                                         |                                                        |                                                       |
| Age; mean (SD)                                         | 40.4 (22.5)                                              | 40.6 (25.1)                                             | 40.4 (22.5)                                            | 41.2 (23.9)                                           |
| Sex; n (%)                                             |                                                          |                                                         |                                                        |                                                       |
| Female                                                 | 3124 (46.0)                                              | 16417 (48.1)                                            | 3123 (46.0)                                            | 3144 (46.4)                                           |
| Male                                                   | 3652 (53.8)                                              | 17677 (51.8)                                            | 3649 (53.8)                                            | 3629 (53.5)                                           |
| Other                                                  | 10 (0.1)                                                 | 45 (0.1)                                                | 10 (0.1)                                               | 10 (0.1)                                              |
| Race; n (%)                                            |                                                          |                                                         |                                                        |                                                       |
| White                                                  | 3864 (56.9)                                              | 21263 (62.3)                                            | 3864 (57.0)                                            | 3898 (57.5)                                           |
| Black or African American                              | 1682 (24.8)                                              | 6517 (19.1)                                             | 1678 (24.7)                                            | 1670 (24.6)                                           |
| Asian                                                  | 159 (2.3)                                                | 1016 (3.0)                                              | 159 (2.3)                                              | 157 (2.3)                                             |
| American Indian or Alaska Native                       | 75 (1.1)                                                 | 349 (1.0)                                               | 75 (1.1)                                               | 81 (1.2)                                              |
| Native Hawaiian or Other Pacific Islander              | 18 (0.3)                                                 | 72 (0.2)                                                | 18 (0.3)                                               | 18 (0.3)                                              |
| Unknown                                                | 988 (14.6)                                               | 4922 (14.4)                                             | 988 (14.6)                                             | 958 (14.1)                                            |
| Ethnicity; n (%)                                       |                                                          |                                                         |                                                        |                                                       |
| Hispanic or Latino                                     | 849 (12.5)                                               | 4304 (12.6)                                             | 848 (12.5)                                             | 866 (12.8)                                            |
| Not Hispanic or Latino                                 | 5235 (77.1)                                              | 25663 (75.2)                                            | 5232 (77.1)                                            | 5256 (77.5)                                           |
| Unknown                                                | 702 (10.3)                                               | 4172 (12.2)                                             | 702 (10.4)                                             | 660 (9.7)                                             |
| Problems related to housing and economic circumstances | 92 (1.4)                                                 | 444 (1.3)                                               | 92 (1.4)                                               | 91 (1.3)                                              |
| <b>COMORBIDITIES</b>                                   |                                                          |                                                         |                                                        |                                                       |
| Overweight and obesity                                 | 1420 (20.9)                                              | 5142 (15.1)                                             | 1418 (20.9)                                            | 1436 (21.2)                                           |
| Hypertensive disease; n (%)                            |                                                          |                                                         |                                                        |                                                       |
| Hypertensive diseases                                  | 3270 (48.2)                                              | 14217 (41.6)                                            | 3266 (48.2)                                            | 3242 (47.8)                                           |
| Hypertensive diseases (deprecated 2018)                | 3265 (48.1)                                              | 14189 (41.6)                                            | 3261 (48.1)                                            | 3238 (47.7)                                           |
| Diabetes mellitus; n (%)                               |                                                          |                                                         |                                                        |                                                       |
| Type 1 diabetes mellitus                               | 413 (6.1)                                                | 1343 (3.9)                                              | 411 (6.1)                                              | 410 (6.0)                                             |
| Type 2 diabetes mellitus                               | 1579 (23.3)                                              | 6377 (18.7)                                             | 1575 (23.2)                                            | 1574 (23.2)                                           |
| Chronic lower respiratory diseases; n (%)              |                                                          |                                                         |                                                        |                                                       |
| Asthma                                                 | 795 (11.7)                                               | 3348 (9.8)                                              | 794 (11.7)                                             | 783 (11.5)                                            |
| Bronchiectasis                                         | 111 (1.6)                                                | 367 (1.1)                                               | 109 (1.6)                                              | 104 (1.5)                                             |
| Bronchitis, not specified as acute or chronic          | 286 (4.2)                                                | 1066 (3.1)                                              | 284 (4.2)                                              | 273 (4.0)                                             |
| Emphysema                                              | 233 (3.4)                                                | 851 (2.5)                                               | 231 (3.4)                                              | 246 (3.6)                                             |
| Other chronic obstructive pulmonary disease            | 567 (8.4)                                                | 2538 (7.4)                                              | 564 (8.3)                                              | 558 (8.2)                                             |
| Simple and mucopurulent chronic bronchitis             | 42 (0.6)                                                 | 147 (0.4)                                               | 42 (0.6)                                               | 48 (0.7)                                              |
| Unspecified chronic bronchitis                         | 56 (0.8)                                                 | 203 (0.6)                                               | 55 (0.8)                                               | 51 (0.8)                                              |
| Nicotine dependence                                    | 1149 (16.9)                                              | 5062 (14.8)                                             | 1147 (16.9)                                            | 1130 (16.7)                                           |
| Psychiatric comorbidities; n (%)                       |                                                          |                                                         |                                                        |                                                       |
| Anxiety disorders                                      | 1738 (25.6)                                              | 6872 (20.1)                                             | 1734 (25.6)                                            | 1706 (25.2)                                           |
| Substance misuse                                       | 1725 (25.4)                                              | 7734 (22.7)                                             | 1722 (25.4)                                            | 1669 (24.6)                                           |
| Mood disorders                                         | 1523 (22.4)                                              | 6381 (18.7)                                             | 1521 (22.4)                                            | 1515 (22.3)                                           |
| Psychotic disorders                                    | 240 (3.5)                                                | 1047 (3.1)                                              | 240 (3.5)                                              | 237 (3.5)                                             |
| Heart disease; n (%)                                   |                                                          |                                                         |                                                        |                                                       |
| Ischemic heart diseases                                | 1513 (22.3)                                              | 6846 (20.1)                                             | 1510 (22.3)                                            | 1498 (22.1)                                           |
| Other forms of heart disease                           | 3336 (49.2)                                              | 14972 (43.9)                                            | 3332 (49.1)                                            | 3233 (47.7)                                           |

|                                                                   |             |              |             |             |
|-------------------------------------------------------------------|-------------|--------------|-------------|-------------|
| Chronic kidney diseases; n (%)                                    |             |              |             |             |
| Chronic kidney disease (CKD)                                      | 1316 (19.4) | 5004 (14.7)  | 1313 (19.4) | 1308 (19.3) |
| Hypertensive chronic kidney disease                               | 867 (12.8)  | 3084 (9.0)   | 865 (12.8)  | 861 (12.7)  |
| Chronic liver diseases; n (%)                                     |             |              |             |             |
| Alcoholic liver disease                                           | 66 (1.0)    | 977 (2.9)    | 66 (1.0)    | 61 (0.9)    |
| Chronic hepatitis, not elsewhere classified                       | 28 (0.4)    | 177 (0.5)    | 28 (0.4)    | 30 (0.4)    |
| Chronic passive congestion of liver                               | 195 (2.9)   | 904 (2.6)    | 194 (2.9)   | 196 (2.9)   |
| Fatty (change of) liver, not elsewhere classified                 | 344 (5.1)   | 1479 (4.3)   | 344 (5.1)   | 335 (4.9)   |
| Fibrosis and cirrhosis of liver                                   | 160 (2.4)   | 1887 (5.5)   | 160 (2.4)   | 151 (2.2)   |
| Hepatic failure, not elsewhere classified                         | 343 (5.1)   | 2042 (6.0)   | 342 (5.0)   | 299 (4.4)   |
| Other specified diseases of liver                                 | 447 (6.6)   | 2107 (6.2)   | 447 (6.6)   | 447 (6.6)   |
| Portal hypertension                                               | 83 (1.2)    | 1308 (3.8)   | 83 (1.2)    | 74 (1.1)    |
| Cerebral infarction                                               | 723 (10.7)  | 4293 (12.6)  | 723 (10.7)  | 666 (9.8)   |
| Dementia; n (%)                                                   |             |              |             |             |
| Alzheimer's disease                                               | 14 (0.2)    | 77 (0.2)     | 14 (0.2)    | 16 (0.2)    |
| Dementia in other diseases classified elsewhere                   | 30 (0.4)    | 127 (0.4)    | 30 (0.4)    | 28 (0.4)    |
| Dementia with Lewy bodies                                         | 10 (0.1)    | 21 (0.06)    | 10 (0.1)    | 10 (0.1)    |
| Frontotemporal dementia                                           | 10 (0.1)    | 10 (0.03)    | 10 (0.1)    | 10 (0.1)    |
| Unspecified dementia                                              | 67 (1.0)    | 354 (1.0)    | 67 (1.0)    | 65 (1.0)    |
| Vascular dementia                                                 | 26 (0.4)    | 98 (0.3)     | 26 (0.4)    | 34 (0.5)    |
| Neoplasms; n (%)                                                  |             |              |             |             |
| Malignant neoplasms of lymphoid, hematopoietic and related tissue | 1064 (15.7) | 3103 (9.1)   | 1062 (15.7) | 1060 (15.6) |
| Neoplasms (any including benign)                                  | 2363 (34.8) | 9496 (27.8)  | 2360 (34.8) | 2297 (33.9) |
| Organ transplant; n (%)                                           |             |              |             |             |
| Liver Transplantation Procedures                                  | 23 (0.3)    | 251 (0.7)    | 23 (0.3)    | 21 (0.3)    |
| Renal Transplantation Procedures                                  | 34 (0.5)    | 230 (0.7)    | 34 (0.5)    | 31 (0.5)    |
| Psoriasis                                                         | 90 (1.3)    | 376 (1.1)    | 90 (1.3)    | 95 (1.4)    |
| Rheumatoid arthritis; n (%)                                       |             |              |             |             |
| Other rheumatoid arthritis                                        | 219 (3.2)   | 1012 (3.0)   | 219 (3.2)   | 237 (3.5)   |
| Rheumatoid arthritis with rheumatoid factor                       | 40 (0.6)    | 136 (0.4)    | 40 (0.6)    | 44 (0.6)    |
| Systemic lupus erythematosus (SLE)                                | 269 (4.0)   | 1205 (3.5)   | 269 (4.0)   | 282 (4.2)   |
| Disorders involving the immune mechanism                          | 862 (12.7)  | 2915 (8.5)   | 859 (12.7)  | 826 (12.2)  |
| <b>MEDICATIONS</b>                                                |             |              |             |             |
| COVID-19 vaccine; n (%)                                           |             |              |             |             |
| Pfizer                                                            | 0 (0.0)     | 0 (0.0)      | 0 (0.0)     | 0 (0.0)     |
| Moderna                                                           | 0 (0.0)     | 0 (0.0)      | 0 (0.0)     | 0 (0.0)     |
| Janssen                                                           | 0 (0.0)     | 0 (0.0)      | 0 (0.0)     | 0 (0.0)     |
| Not specified                                                     | 0 (0.0)     | 0 (0.0)      | 0 (0.0)     | 0 (0.0)     |
| Antidepressants; n (%)                                            |             |              |             |             |
| Any                                                               | 2472 (36.4) | 10308 (30.2) | 2468 (36.4) | 2537 (37.4) |
| Fluvoxamine                                                       | 10 (0.1)    | 35 (0.1)     | 10 (0.1)    | 10 (0.1)    |
| Lithium                                                           | 23 (0.3)    | 124 (0.4)    | 23 (0.3)    | 26 (0.4)    |
| Antipsychotics; n (%)                                             |             |              |             |             |
| Any                                                               | 1354 (20.0) | 4624 (13.5)  | 1351 (19.9) | 1349 (19.9) |
| Clozapine                                                         | 10 (0.1)    | 19 (0.06)    | 10 (0.1)    | 10 (0.1)    |

**Supplementary Table 10:** Baseline characteristics from the EHR dataset in the cohorts hospitalised before the COVID-19 pandemic (i.e. without COVID-19), and with high and low D-dimer, before and after propensity score matching.

|                                                        | <b>Other<br/>hospitalisation<br/>High D-dimer<br/>(Unmatched)</b> | <b>Other<br/>hospitalisation<br/>Low D-dimer<br/>(Unmatched)</b> | <b>Other<br/>hospitalisation<br/>High D-dimer<br/>(Matched)</b> | <b>Other<br/>hospitalisation<br/>Low D-dimer<br/>(Matched)</b> |
|--------------------------------------------------------|-------------------------------------------------------------------|------------------------------------------------------------------|-----------------------------------------------------------------|----------------------------------------------------------------|
| Total Number                                           | 16099                                                             | 12148                                                            | 11129                                                           | 11129                                                          |
| <b>DEMOGRAPHICS</b>                                    |                                                                   |                                                                  |                                                                 |                                                                |
| Age; mean (SD)                                         | 47.4 (23.0)                                                       | 49.2 (20.1)                                                      | 49.1 (22.1)                                                     | 48.8 (20.5)                                                    |
| Sex; n (%)                                             |                                                                   |                                                                  |                                                                 |                                                                |
| Female                                                 | 8607 (53.5)                                                       | 6799 (56.0)                                                      | 6109 (54.9)                                                     | 6112 (54.9)                                                    |
| Male                                                   | 7459 (46.3)                                                       | 5349 (44.0)                                                      | 5020 (45.1)                                                     | 5017 (45.1)                                                    |
| Other                                                  | 33 (0.2)                                                          | 0 (0.0)                                                          | 0 (0.0)                                                         | 0 (0.0)                                                        |
| Race; n (%)                                            |                                                                   |                                                                  |                                                                 |                                                                |
| White                                                  | 9158 (56.9)                                                       | 7702 (63.4)                                                      | 6902 (62.0)                                                     | 6919 (62.2)                                                    |
| Black or African American                              | 4133 (25.7)                                                       | 2511 (20.7)                                                      | 2446 (22.0)                                                     | 2417 (21.7)                                                    |
| Asian                                                  | 415 (2.6)                                                         | 208 (1.7)                                                        | 204 (1.8)                                                       | 204 (1.8)                                                      |
| American Indian or Alaska Native                       | 136 (0.8)                                                         | 120 (1.0)                                                        | 108 (1.0)                                                       | 107 (1.0)                                                      |
| Native Hawaiian or Other Pacific Islander              | 42 (0.3)                                                          | 31 (0.3)                                                         | 30 (0.3)                                                        | 30 (0.3)                                                       |
| Unknown                                                | 2215 (13.8)                                                       | 1576 (13.0)                                                      | 1439 (12.9)                                                     | 1452 (13.0)                                                    |
| Ethnicity; n (%)                                       |                                                                   |                                                                  |                                                                 |                                                                |
| Hispanic or Latino                                     | 1826 (11.3)                                                       | 1284 (10.6)                                                      | 1138 (10.2)                                                     | 1209 (10.9)                                                    |
| Not Hispanic or Latino                                 | 12414 (77.1)                                                      | 9872 (81.3)                                                      | 9055 (81.4)                                                     | 8945 (80.4)                                                    |
| Unknown                                                | 1859 (11.5)                                                       | 992 (8.2)                                                        | 936 (8.4)                                                       | 975 (8.8)                                                      |
| Problems related to housing and economic circumstances | 320 (2.0)                                                         | 359 (3.0)                                                        | 271 (2.4)                                                       | 292 (2.6)                                                      |
| <b>COMORBIDITIES</b>                                   |                                                                   |                                                                  |                                                                 |                                                                |
| Overweight and obesity                                 | 3336 (20.7)                                                       | 3357 (27.6)                                                      | 2765 (24.8)                                                     | 2769 (24.9)                                                    |
| Hypertensive disease; n (%)                            |                                                                   |                                                                  |                                                                 |                                                                |
| Hypertensive diseases                                  | 7854 (48.8)                                                       | 6569 (54.1)                                                      | 5813 (52.2)                                                     | 5774 (51.9)                                                    |
| Hypertensive diseases (deprecated 2018)                | 7838 (48.7)                                                       | 6558 (54.0)                                                      | 5800 (52.1)                                                     | 5764 (51.8)                                                    |
| Diabetes mellitus; n (%)                               |                                                                   |                                                                  |                                                                 |                                                                |
| Type 1 diabetes mellitus                               | 868 (5.4)                                                         | 919 (7.6)                                                        | 725 (6.5)                                                       | 729 (6.5)                                                      |
| Type 2 diabetes mellitus                               | 3806 (23.6)                                                       | 3519 (29.0)                                                      | 3022 (27.2)                                                     | 2971 (26.7)                                                    |
| Chronic lower respiratory diseases; n (%)              |                                                                   |                                                                  |                                                                 |                                                                |
| Asthma                                                 | 2064 (12.8)                                                       | 2221 (18.3)                                                      | 1751 (15.7)                                                     | 1777 (16.0)                                                    |
| Bronchiectasis                                         | 192 (1.2)                                                         | 192 (1.6)                                                        | 154 (1.4)                                                       | 156 (1.4)                                                      |
| Bronchitis, not specified as acute or chronic          | 824 (5.1)                                                         | 976 (8.0)                                                        | 739 (6.6)                                                       | 742 (6.7)                                                      |
| Emphysema                                              | 549 (3.4)                                                         | 495 (4.1)                                                        | 419 (3.8)                                                       | 430 (3.9)                                                      |
| Other chronic obstructive pulmonary disease            | 1946 (12.1)                                                       | 1895 (15.6)                                                      | 1553 (14.0)                                                     | 1595 (14.3)                                                    |
| Simple and mucopurulent chronic bronchitis             | 119 (0.7)                                                         | 114 (0.9)                                                        | 88 (0.8)                                                        | 91 (0.8)                                                       |
| Unspecified chronic bronchitis                         | 149 (0.9)                                                         | 169 (1.4)                                                        | 124 (1.1)                                                       | 128 (1.1)                                                      |
| Nicotine dependence                                    | 2849 (17.7)                                                       | 2850 (23.5)                                                      | 2338 (21.0)                                                     | 2339 (21.0)                                                    |
| Psychiatric comorbidities; n (%)                       |                                                                   |                                                                  |                                                                 |                                                                |
| Anxiety disorders                                      | 3835 (23.8)                                                       | 3811 (31.4)                                                      | 3133 (28.2)                                                     | 3154 (28.3)                                                    |
| Substance misuse                                       | 3979 (24.7)                                                       | 3721 (30.6)                                                      | 3129 (28.1)                                                     | 3109 (27.9)                                                    |
| Mood disorders                                         | 3634 (22.6)                                                       | 3616 (29.8)                                                      | 2929 (26.3)                                                     | 2972 (26.7)                                                    |
| Psychotic disorders                                    | 673 (4.2)                                                         | 599 (4.9)                                                        | 491 (4.4)                                                       | 504 (4.5)                                                      |
| Heart disease; n (%)                                   |                                                                   |                                                                  |                                                                 |                                                                |
| Ischemic heart diseases                                | 3615 (22.5)                                                       | 3411 (28.1)                                                      | 2888 (25.9)                                                     | 2878 (25.9)                                                    |
| Other forms of heart disease                           | 7297 (45.3)                                                       | 5864 (48.3)                                                      | 5244 (47.1)                                                     | 5227 (47.0)                                                    |
| Chronic kidney diseases; n (%)                         |                                                                   |                                                                  |                                                                 |                                                                |

|                                                                   |             |             |             |             |
|-------------------------------------------------------------------|-------------|-------------|-------------|-------------|
| Chronic kidney disease (CKD)                                      | 2872 (17.8) | 1971 (16.2) | 1846 (16.6) | 1829 (16.4) |
| Hypertensive chronic kidney disease                               | 1851 (11.5) | 1242 (10.2) | 1194 (10.7) | 1165 (10.5) |
| Chronic liver diseases; n (%)                                     |             |             |             |             |
| Alcoholic liver disease                                           | 437 (2.7)   | 171 (1.4)   | 181 (1.6)   | 169 (1.5)   |
| Chronic hepatitis, not elsewhere classified                       | 74 (0.5)    | 57 (0.5)    | 49 (0.4)    | 48 (0.4)    |
| Chronic passive congestion of liver                               | 362 (2.2)   | 257 (2.1)   | 239 (2.1)   | 236 (2.1)   |
| Fatty (change of) liver, not elsewhere classified                 | 825 (5.1)   | 795 (6.5)   | 625 (5.6)   | 658 (5.9)   |
| Fibrosis and cirrhosis of liver                                   | 756 (4.7)   | 362 (3.0)   | 365 (3.3)   | 346 (3.1)   |
| Hepatic failure, not elsewhere classified                         | 778 (4.8)   | 228 (1.9)   | 228 (2.0)   | 227 (2.0)   |
| Other specified diseases of liver                                 | 974 (6.0)   | 765 (6.3)   | 653 (5.9)   | 664 (6.0)   |
| Portal hypertension                                               | 464 (2.9)   | 162 (1.3)   | 162 (1.5)   | 158 (1.4)   |
| Cerebral infarction                                               | 1322 (8.2)  | 1079 (8.9)  | 962 (8.6)   | 963 (8.7)   |
| Dementia; n (%)                                                   |             |             |             |             |
| Alzheimer's disease                                               | 61 (0.4)    | 26 (0.2)    | 21 (0.2)    | 26 (0.2)    |
| Dementia in other diseases classified elsewhere                   | 86 (0.5)    | 53 (0.4)    | 47 (0.4)    | 46 (0.4)    |
| Dementia with Lewy bodies                                         | 10 (0.06)   | 12 (0.1)    | 10 (0.09)   | 10 (0.09)   |
| Frontotemporal dementia                                           | 10 (0.06)   | 10 (0.08)   | 10 (0.09)   | 10 (0.09)   |
| Unspecified dementia                                              | 244 (1.5)   | 186 (1.5)   | 164 (1.5)   | 170 (1.5)   |
| Vascular dementia                                                 | 55 (0.3)    | 38 (0.3)    | 31 (0.3)    | 37 (0.3)    |
| Neoplasms; n (%)                                                  |             |             |             |             |
| Malignant neoplasms of lymphoid, hematopoietic and related tissue | 1469 (9.1)  | 850 (7.0)   | 802 (7.2)   | 831 (7.5)   |
| Neoplasms (any including benign)                                  | 4563 (28.3) | 3663 (30.2) | 3211 (28.9) | 3211 (28.9) |
| Organ transplant; n (%)                                           |             |             |             |             |
| Liver Transplantation Procedures                                  | 94 (0.6)    | 14 (0.1)    | 18 (0.2)    | 14 (0.1)    |
| Renal Transplantation Procedures                                  | 71 (0.4)    | 31 (0.3)    | 31 (0.3)    | 31 (0.3)    |
| Psoriasis                                                         | 220 (1.4)   | 207 (1.7)   | 158 (1.4)   | 164 (1.5)   |
| Rheumatoid arthritis; n (%)                                       |             |             |             |             |
| Other rheumatoid arthritis                                        | 658 (4.1)   | 529 (4.4)   | 459 (4.1)   | 457 (4.1)   |
| Rheumatoid arthritis with rheumatoid factor                       | 93 (0.6)    | 69 (0.6)    | 65 (0.6)    | 59 (0.5)    |
| Systemic lupus erythematosus (SLE)                                | 733 (4.6)   | 441 (3.6)   | 402 (3.6)   | 417 (3.7)   |
| Disorders involving the immune mechanism                          | 1357 (8.4)  | 953 (7.8)   | 872 (7.8)   | 860 (7.7)   |
| MEDICATIONS                                                       |             |             |             |             |
| COVID-19 vaccine; n (%)                                           |             |             |             |             |
| Pfizer                                                            | 0 (0.0)     | 0 (0.0)     | 0 (0.0)     | 0 (0.0)     |
| Moderna                                                           | 0 (0.0)     | 0 (0.0)     | 0 (0.0)     | 0 (0.0)     |
| Janssen                                                           | 0 (0.0)     | 0 (0.0)     | 0 (0.0)     | 0 (0.0)     |
| Not specified                                                     | 0 (0.0)     | 0 (0.0)     | 0 (0.0)     | 0 (0.0)     |
| Antidepressants; n (%)                                            |             |             |             |             |
| Any                                                               | 6441 (40.0) | 5260 (43.3) | 4623 (41.5) | 4641 (41.7) |
| Fluvoxamine                                                       | 21 (0.1)    | 24 (0.2)    | 17 (0.2)    | 19 (0.2)    |
| Lithium                                                           | 96 (0.6)    | 98 (0.8)    | 77 (0.7)    | 82 (0.7)    |
| Antipsychotics; n (%)                                             |             |             |             |             |
| Any                                                               | 2908 (18.1) | 2110 (17.4) | 1857 (16.7) | 1904 (17.1) |
| Clozapine                                                         | 21 (0.1)    | 24 (0.2)    | 18 (0.2)    | 21 (0.2)    |

## References

1. Evans, R. A. *et al.* Physical, cognitive, and mental health impacts of COVID-19 after hospitalisation (PHOSP-COVID): a UK multicentre, prospective cohort study. *Lancet Respir Med* **9**, 1275–1287 (2021).
