# Supplementary material for: Acute blood biomarker profiles predict cognitive deficits 6 and 12 months after COVID-19 hospitalization
Source: PubMed Central journal article supplement (PMC10579097; doi:10.1038/s41591-023-02525-y), 2023-08-31
Supplement: 41591_2023_2525_MOESM2_ESM.pdf [file 41591_2023_2525_MOESM2_ESM.pdf]

## Reporting Summary

Nature Portfolio wishes to improve the reproducibility of the work that we publish. This form provides structure for consistency and transparency in reporting. For further information on Nature Portfolio policies, see our [Editorial Policies](#) and the [Editorial Policy Checklist](#).

### Statistics

For all statistical analyses, confirm that the following items are present in the figure legend, table legend, main text, or Methods section.

- |                          |                                                                                                                                                                                                                                                                                                |
|--------------------------|------------------------------------------------------------------------------------------------------------------------------------------------------------------------------------------------------------------------------------------------------------------------------------------------|
| n/a                      | Confirmed                                                                                                                                                                                                                                                                                      |
| <input type="checkbox"/> | <input checked="" type="checkbox"/> The exact sample size ( $n$ ) for each experimental group/condition, given as a discrete number and unit of measurement                                                                                                                                    |
| <input type="checkbox"/> | <input checked="" type="checkbox"/> A statement on whether measurements were taken from distinct samples or whether the same sample was measured repeatedly                                                                                                                                    |
| <input type="checkbox"/> | <input checked="" type="checkbox"/> The statistical test(s) used AND whether they are one- or two-sided<br><i>Only common tests should be described solely by name; describe more complex techniques in the Methods section.</i>                                                               |
| <input type="checkbox"/> | <input checked="" type="checkbox"/> A description of all covariates tested                                                                                                                                                                                                                     |
| <input type="checkbox"/> | <input checked="" type="checkbox"/> A description of any assumptions or corrections, such as tests of normality and adjustment for multiple comparisons                                                                                                                                        |
| <input type="checkbox"/> | <input checked="" type="checkbox"/> A full description of the statistical parameters including central tendency (e.g. means) or other basic estimates (e.g. regression coefficient) AND variation (e.g. standard deviation) or associated estimates of uncertainty (e.g. confidence intervals) |
| <input type="checkbox"/> | <input checked="" type="checkbox"/> For null hypothesis testing, the test statistic (e.g. $F$ , $t$ , $r$ ) with confidence intervals, effect sizes, degrees of freedom and $P$ value noted<br><i>Give <math>P</math> values as exact values whenever suitable.</i>                            |
| <input type="checkbox"/> | <input checked="" type="checkbox"/> For Bayesian analysis, information on the choice of priors and Markov chain Monte Carlo settings                                                                                                                                                           |
| <input type="checkbox"/> | <input checked="" type="checkbox"/> For hierarchical and complex designs, identification of the appropriate level for tests and full reporting of outcomes                                                                                                                                     |
| <input type="checkbox"/> | <input checked="" type="checkbox"/> Estimates of effect sizes (e.g. Cohen's $d$ , Pearson's $r$ ), indicating how they were calculated                                                                                                                                                         |

*Our web collection on [statistics for biologists](#) contains articles on many of the points above.*

### Software and code

Policy information about [availability of computer code](#)

Data collection

Data analysis

For manuscripts utilizing custom algorithms or software that are central to the research but not yet described in published literature, software must be made available to editors and reviewers. We strongly encourage code deposition in a community repository (e.g. GitHub). See the Nature Portfolio [guidelines for submitting code & software](#) for further information.

### Data

Policy information about [availability of data](#)

All manuscripts must include a [data availability statement](#). This statement should provide the following information, where applicable:

- Accession codes, unique identifiers, or web links for publicly available datasets
- A description of any restrictions on data availability
- For clinical datasets or third party data, please ensure that the statement adheres to our [policy](#)

For the PHOSP-COVID data, the protocol, consent form, definition and derivation of clinical characteristics and outcomes, training materials, regulatory documents, requests for data access and other relevant study materials are available online at <https://www.phosp.org>.

For the TriNetX data, the system returned the results of these analyses as csv files, which we downloaded and archived. Aggregate data, as presented in this article, can be freely accessed at <https://osf.io/kzhfs/>. This study had no special privileges. Inclusion criteria specified in the Methods and Supplementary Material would allow other researchers to identify similar cohorts of patients as we used here for these analyses; however, TriNetX is a live platform with new data being added daily so exact counts will vary. To gain access to the data, a request can be made to TriNetX ([join@trinetx.com](mailto:join@trinetx.com)), but costs might be incurred, and a data sharing agreement would be necessary.

## Human research participants

Policy information about [studies involving human research participants and Sex and Gender in Research](#).

### Reporting on sex and gender

In this study we only collected information on participants' sex (biological attribute) and throughout the manuscript we referred to it by its appropriate name. Findings presented in this manuscript apply to all participants regardless of the reported sex. This variable was determined on self-reporting. The sex was split into 2 categories: Female and Male. Overall, the study consisted of 673 female participants and 1060 male participants, with the remaining 104 participants with a missing record. The study did not collect participants' gender as it was assumed not to influence COVID-19 severity and the resulting COVID-19 induced cognitive deficit.

### Population characteristics

1837 human research participants, with a mean (SD) age of 57.9 (12.4); 57.7% reported their sex as "Male", 36.6% as "Female" and 5.7% provided no information of their reported sex. Participants mostly white (75.4%) or Asian (11.8%), broadly uniformly split across categories of the highest attained education level or reported household income. Mostly married (56.3%) and reporting English as their first language (80%). Prevalence of cardiovascular condition was 45%, diabetes was 19.9%, respiratory condition was 27.6%, rheumatological condition was 15.5%, psychiatric condition was 18.1% and a gastrointestinal condition was 21.3%.

### Recruitment

The researchers collected data from clinic visits and from routine health records of all participants. This included signs and symptoms, medication, physical test results, questionnaire answers, laboratory test results and imaging. In a subset of participants, the researchers undertook additional research tests and obtained samples (for example, blood) for research experiments. Some participants were asked to take part in additional studies. The baseline characteristics of the PHOSP-COVID cohort appear largely representative of the general population of individuals hospitalised with COVID-19. In addition, the baseline characteristics of participants recruited in the Tier 2 sub-study of PHOSP-COVID (used here) were largely similar to those of the larger cohort recruited in Tier 1 (which only involved remote data collection based on their health records). This suggests that none of the baseline characteristics recorded were important determinants of self-selection in the study. However, it is possible that other non-recorded characteristics (e.g. general attitude towards science and medicine, genetic characteristics, etc) might have influenced self-selection. In this regard, the replication of the findings using real-world data is important as the latter is not subject to any form of self-selection.

### Ethics oversight

Approved 14/07/2020, Yorkshire & The Humber-Leeds West Research Ethics Committee (NHSBT Newcastle Blood Donor Centre, Holland Drive, Newcastle upon Tyne, NE2 4NQ, UK; +44 (0)207 972 2504, +44 (0)207 104 8088, +44 (0)207 104 8018; leedswest.rec@hra.nhs.uk), REC ref: 20/YH/0225

Note that full information on the approval of the study protocol must also be provided in the manuscript.

## Field-specific reporting

Please select the one below that is the best fit for your research. If you are not sure, read the appropriate sections before making your selection.

Life sciences  Behavioural & social sciences  Ecological, evolutionary & environmental sciences

For a reference copy of the document with all sections, see [nature.com/documents/nr-reporting-summary-flat.pdf](https://nature.com/documents/nr-reporting-summary-flat.pdf)

## Life sciences study design

All studies must disclose on these points even when the disclosure is negative.

### Sample size

All participants of the PHOSP-COVID Tier 2 study were eligible. We applied some exclusion criteria (see below) to make sure that they had some measurements for the variable of interest.

### Data exclusions

To be part of the PHOSP study, individuals were excluded if they met any of the following exclusion criteria:

1. Confirmed diagnosis of a pathogen unrelated to the objectives of this study and no indication or likelihood of co-infection with a relevant pathogen
2. Attendance at an A&E or emergency department only
3. Refusal by participant, parent or appropriate representative
4. Other life-limiting illness with life expectancy <6 months such as disseminated malignancy

In addition, among those who were part of the PHOSP Tier 2 study, those who were included in this sub-study could not meet any of the following exclusion criteria:

- missing records for all of the six key biomarkers considered in the study;
- missing value for all of the MoCA components.

|               |                                                                                                                                                                                                                                                                                                                                                                                                                                                                                                                                                                                                                                                                                                                                                                                                                                                                                                                                                                                                                                                                                                                                                                                                                                   |
|---------------|-----------------------------------------------------------------------------------------------------------------------------------------------------------------------------------------------------------------------------------------------------------------------------------------------------------------------------------------------------------------------------------------------------------------------------------------------------------------------------------------------------------------------------------------------------------------------------------------------------------------------------------------------------------------------------------------------------------------------------------------------------------------------------------------------------------------------------------------------------------------------------------------------------------------------------------------------------------------------------------------------------------------------------------------------------------------------------------------------------------------------------------------------------------------------------------------------------------------------------------|
| Replication   | <p>Replication of the main study finding was performed on a separate population using electronic health records (EHR) data from TriNetX Analytics, a large-scale EHR network covering over 90 million patients predominantly in the USA. Within this dataset, all individuals hospitalised with COVID-19 were identified and divided into dichotomous subgroups based on the measurements of key biomarkers - fibrinogen, CRP and D-dimer.</p> <p>Within the TriNetX platform we were able to successfully replicate the main findings identified in the primary analysis.</p> <p>The first dimension of covariation was replicated by comparing TriNetX sub-cohorts with high fibrinogen and normal CRP to subjects with low fibrinogen and normal CRP. In this comparison, fibrinogen level was found to be statistically significantly associated with post-COVID-19 cognitive deficits.</p> <p>The second dimension was replicated by comparing a cohort with high D-dimer and normal CRP to cohort with low D-dimer and normal CRP at the time of the acute infection with SARS-CoV-2. In this comparison, D-dimer levels were found to be statistically significantly associated with post-COVID-19 cognitive deficits.</p> |
| Randomization | <p>For the prospective part of the study, the analysis was adjusted for a range of covariates included in a linear regression model from which residuals were used as input to the analysis. Top and bottom half of the cohorts along dimensions of covariation were note to be well balanced in terms of covariates. For the retrospective part of the study, cohorts were propensity-score matched on a wide range of covariates and appropriate matching was tested using standardised mean difference.</p>                                                                                                                                                                                                                                                                                                                                                                                                                                                                                                                                                                                                                                                                                                                    |
| Blinding      | <p>Blinding was not relevant for this study as there was no groups which were compared in the primary analysis. Instead, a discovery science approach was used to identify biomarker profiles linked to cognitive profiles.</p>                                                                                                                                                                                                                                                                                                                                                                                                                                                                                                                                                                                                                                                                                                                                                                                                                                                                                                                                                                                                   |

## Reporting for specific materials, systems and methods

We require information from authors about some types of materials, experimental systems and methods used in many studies. Here, indicate whether each material, system or method listed is relevant to your study. If you are not sure if a list item applies to your research, read the appropriate section before selecting a response.

### Materials & experimental systems

### Methods

- | n/a                                 | Involved in the study                                  |
|-------------------------------------|--------------------------------------------------------|
| <input checked="" type="checkbox"/> | <input type="checkbox"/> Antibodies                    |
| <input checked="" type="checkbox"/> | <input type="checkbox"/> Eukaryotic cell lines         |
| <input checked="" type="checkbox"/> | <input type="checkbox"/> Palaeontology and archaeology |
| <input checked="" type="checkbox"/> | <input type="checkbox"/> Animals and other organisms   |
| <input type="checkbox"/>            | <input checked="" type="checkbox"/> Clinical data      |
| <input checked="" type="checkbox"/> | <input type="checkbox"/> Dual use research of concern  |

- | n/a                                 | Involved in the study                           |
|-------------------------------------|-------------------------------------------------|
| <input checked="" type="checkbox"/> | <input type="checkbox"/> ChIP-seq               |
| <input checked="" type="checkbox"/> | <input type="checkbox"/> Flow cytometry         |
| <input checked="" type="checkbox"/> | <input type="checkbox"/> MRI-based neuroimaging |

## Clinical data

Policy information about [clinical studies](#)

All manuscripts should comply with the ICMJE [guidelines for publication of clinical research](#) and a completed [CONSORT checklist](#) must be included with all submissions.

|                             |                                                                                                                                                                                                                                                                                                                                                                                                                                                                                                                               |
|-----------------------------|-------------------------------------------------------------------------------------------------------------------------------------------------------------------------------------------------------------------------------------------------------------------------------------------------------------------------------------------------------------------------------------------------------------------------------------------------------------------------------------------------------------------------------|
| Clinical trial registration | <p>IRAS number<br/>285439</p> <p>Protocol/serial number<br/>CPMS 46443, IRAS 285439</p>                                                                                                                                                                                                                                                                                                                                                                                                                                       |
| Study protocol              | <p>Study protocol is available under the following link<br/><a href="https://www.phosp.org/document/102/">https://www.phosp.org/document/102/</a><br/>Accessing the document requires a password.</p>                                                                                                                                                                                                                                                                                                                         |
| Data collection             | <p>Dates of recruitment: August 2020 and March 2022 of patients hospitalised with COVID-19 between January 29, 2020 and November 20, 2021. Data collection at 6 and 12 months post-hospitalisation for each participant.</p> <p>Countries of recruitment: England, Northern Ireland, Scotland, Wales</p> <p>Trial participating centre<br/>Queen Elizabeth Hospital<br/>Heritage Building<br/>University Hospitals of Birmingham NHS Trust<br/>Mindelsohn Way<br/>Edgbaston<br/>Birmingham<br/>B15 2TH<br/>United Kingdom</p> |

Trial participating centre  
Hull Royal Infirmary  
Hull University Teaching Hospitals NHS Trust  
Anlaby Rd  
Hull  
HU3 2JZ  
United Kingdom

Trial participating centre  
Bradford Royal Infirmary  
Bradford Teaching Hospitals NHS Foundation Trust  
Duckworth Ln  
Bradford  
BD9 6RJ  
United Kingdom

Trial participating centre  
Southmead Hospital  
North Bristol NHS Trust  
Southmead Rd  
Bristol  
BS10 5NB  
United Kingdom

Trial participating centre  
Fulbourn Hospital  
Cambridgeshire and Peterborough NHS Foundation Trust  
Elizabeth House  
Cambridge  
CB21 5EF  
United Kingdom

Trial participating centre  
Royal Papworth Hospital  
Royal Papworth Hospital NHS Foundation Trust  
Papworth Rd  
Trumpington  
Cambridge  
CB2 0AY  
United Kingdom

Trial participating centre  
Leeds General Infirmary  
The Leeds Teaching Hospitals NHS Trust  
Great George St  
Leeds  
LS1 3EX  
United Kingdom

Trial participating centre  
Glenfield Hospital  
University Hospitals of Leicester NHS Trust  
Groby Road  
Leicester  
LE3 9QP  
United Kingdom

Trial participating centre  
Royal Liverpool Hospital  
Liverpool University Hospitals NHS Foundation Trust  
Prescot St  
Liverpool  
L7 8XP  
United Kingdom

Trial participating centre  
St Mary's Hospital  
Imperial College Healthcare NHS Trust  
The Bays  
South Wharf Road  
London  
W2 1NY  
United Kingdom

Trial participating centre  
Chelsea & Westminster Hospital

## Chelsea &amp; Westminster Hospital NHS Trust

369 Fulham Rd  
Chelsea  
London  
SW10 9NH  
United Kingdom

## Trial participating centre

Northwick Park Hospital  
London North West University Healthcare NHS Trust  
Central Middlesex  
Ealing Hospital  
London  
HA1 3UJ  
United Kingdom

## Trial participating centre

Mount Vernon Hospital  
The Hillingdon Hospitals NHS Foundation Trust  
Rickmansworth Road  
Northwood  
London  
HA6 2RN  
United Kingdom

## Trial participating centre

Royal Brompton & Harefield Trust  
Royal Brompton Hospital  
1 Manresa Rd  
Chelsea  
London  
SW3 6LR  
United Kingdom

## Trial participating centre

St Thomas' Hospital  
Guy's and St Thomas' NHS Foundation Trust  
Westminster Bridge Rd  
London  
SE1 7EH  
United Kingdom

## Trial participating centre

King's College Hospital  
King's College Hospital NHS Foundation Trust  
Denmark Hill  
Brixton  
London  
SE5 9RS  
United Kingdom

## Trial participating centre

The Royal Hospital  
Barts Health NHS Trust  
Whitechapel Rd  
London  
E1 1BB  
United Kingdom

## Trial participating centre

University College London Hospital  
University College London Hospitals NHS Foundation Trust  
235 Euston Road  
Bloomsbury  
London  
NW1 2BU  
United Kingdom

## Trial participating centre

The Whittington Hospital  
Whittington Health NHS Trust  
Magdala Ave  
London  
N19 5NF  
United Kingdom

Trial participating centre  
Royal Free Hospital  
Royal Free London NHS Foundation Trust  
17 Lyndhurst Gardens  
Hampstead  
London  
NW3 5NU  
United Kingdom

Trial participating centre  
North Middlesex University Hospital  
North Middlesex University Hospital NHS Trust  
Sterling Way  
London  
N18 1QX  
United Kingdom

Trial participating centre  
St George's Hospital  
St George's University Hospitals NHS Foundation Trust  
Blackshaw Road  
Tooting  
London  
SW17 0QT  
United Kingdom

Trial participating centre  
Manchester Royal Infirmary  
Manchester University NHS Foundation Trust  
Cobbett House  
Oxford Road  
Manchester  
M13 9WL  
United Kingdom

Trial participating centre  
Salford Royal Hospital  
Salford Royal NHS Foundation Trust  
Stott Ln  
Salford  
M6 8HD  
United Kingdom

Trial participating centre  
Freeman Hospital  
Newcastle Upon Tyne Hospitals NHS Foundation Trust  
Freeman Road  
High Heaton  
Newcastle-upon-Tyne  
NE7 7DN  
United Kingdom

Trial participating centre  
Belfast City Hospital  
Belfast Health and Social Care Trust  
A Floor  
Lisburn Road  
Belfast  
BT9 7AB  
United Kingdom

Trial participating centre  
Nottingham City Hospital  
Nottingham University Hospitals NHS Trust  
Hucknall Road  
Nottingham  
NG5 1PB  
United Kingdom

Trial participating centre  
John Radcliffe Hospital  
Oxford University Hospitals NHS Foundation Trust  
Headley Way  
Headington  
Oxford  
OX3 9DU

United Kingdom

Trial participating centre  
NHS Grampian  
Summerfield House  
2 Eday Road  
Aberdeen  
AB15 6RE  
United Kingdom

Trial participating centre  
NHS Dumfries and Galloway  
21-22 High St  
Moffat  
DG10 9HL  
United Kingdom

Trial participating centre  
NHS Tayside  
230 Clepington Rd  
Dundee  
DD2 1GZ  
United Kingdom

Trial participating centre  
NHS Fife  
Hayfield House  
Hayfield Rd  
Kirkcaldy  
KY2 5AH  
United Kingdom

Trial participating centre  
NHS Forth Valley  
Stirling Rd  
Larbert  
FK5 4WR  
United Kingdom

Trial participating centre  
NHS Highland  
Inverness Retail and Business Park  
John Dewar Building  
Highlander Way  
Inverness  
IV2 7GE  
United Kingdom

Trial participating centre  
NHS Greater Glasgow and Clyde  
1055 Great Western Road  
Glasgow  
G12 0XH  
United Kingdom

Trial participating centre  
NHS Lothian  
Search Results  
Morningside Pl  
Edinburgh  
EH10 5HF  
United Kingdom

Trial participating centre  
Royal Hallamshire Hospital  
Sheffield Teaching Hospitals NHS Foundation Trust  
Glossop Rd  
Broomhall  
Sheffield  
S10 2JF  
United Kingdom

Trial participating centre  
Southampton General Hospital,  
University Hospital Southampton NHS Foundation Trust  
Tremona Rd

Southampton  
SO16 6YD  
United Kingdom

Trial participating centre  
Hywel Dda University Health Board  
Ystwyth Building  
St Davids Park  
Jobswell Road  
Carmarthen  
SA31 3BB  
United Kingdom

Trial participating centre  
Swansea Bay University Health Board  
1 Talbot Gateway  
Baglan Energy Park  
Baglan  
Port Talbot  
SA12 7BR  
United Kingdom

Trial participating centre  
Cardiff & Vale University Health Board  
Heath Park  
Cardiff  
CF14 4XW  
United Kingdom

Trial participating centre  
Aneurin Bevan University Health Board  
Ringland Circle  
Newport  
NP19 9PS  
United Kingdom

Trial participating centre  
Betsi Cadwaladr University Health Board  
Glan Clwyd Hospital  
Sarn Ln  
Bodelwyddan  
Rhyl  
LL18 5UJ  
United Kingdom

Trial participating centre  
Lanarkshire Primary Care NHS Trust  
East Kilbride  
Glasgow  
G75 8NH  
United Kingdom

## Outcomes

### Primary outcome measures:

1. The Montreal Cognitive Assessment (MoCA) measured at 6 months following hospitalisation for COVID-19. This consists of 7 distinct items covering several cognitive domains, including short-term memory, visuospatial abilities, abstract reasoning, orientation in time and space, language fluency, sustained attention, and executive function.
2. Cognitive Patient Symptom Questionnaire (C-PSQ) measured at 6 months, following hospitalisation for COVID-19. The questionnaire consisted of 7 items relating to subjects' perceived difficulty in communicating, remembering, concentrating, recalling, and experiencing episodes of confusion or slow thinking.

### Secondary outcome measures:

1. Occupational change anytime within 6 months of hospital discharge following COVID-19 hospitalisation.
2. Occupational change anytime 6 to 12 months after hospital discharge following COVID-19 hospitalisation.
3. Perceived difficulty working anytime within 6 months of hospital discharge following COVID-19 hospitalisation.
4. Perceived difficulty working 6 to 12 months after hospital discharge following COVID-19 hospitalisation.

Difficulty working was assessed based on a simple question "Has your (COVID-19) illness affected your ability to do your usual work?"



Occupational change was based on participants reporting a change in their main occupation which occurred between before and after their COVID-19 illness. We only recorded a positive outcome for those who reported a change in occupation and for whom the occupation after COVID-19 was not "Working full-time". Similarly, for participants who reported a change in occupation and for whom there was no information on their occupation before and after their COVID-19 illness, we reported the change in occupation as 'unknown'.
